# 1 Multi-omics characterization of type 2 diabetes associated genetic variation.

2  
3 Ravi Mandla<sup>1,2,3\*†</sup>, Kim Lorenz<sup>4,5,6,7\*</sup>, Xianyong Yin<sup>8,9\*</sup>, Ozvan Bocher<sup>10\*</sup>, Alicia Huerta-  
4 Chagoya<sup>1,3\*</sup>, Ana Luiza Arruda<sup>10,11\*</sup>, Anthony Piron<sup>12,13,14,15\*</sup>, Susanne Horn<sup>10\*</sup>, Ken Suzuki<sup>16,17,18</sup>,  
5 Konstantinos Hatzikotoulas<sup>10</sup>, Lorraine Southam<sup>10</sup>, Henry Taylor<sup>19,20,21</sup>, Kaiyuan Yang<sup>22,23</sup>, Karin  
6 Hrovatin<sup>24,25</sup>, Yue Tong<sup>26</sup>, Maria Lytrivi<sup>26,27</sup>, Nigel W. Rayner<sup>10</sup>, James B. Meigs<sup>1,28,29</sup>, Mark I.  
7 McCarthy<sup>30,31,32</sup>, Anubha Mahajan<sup>30,31</sup>, Miriam S. Udler<sup>1,2,3,28</sup>, Cassandra N. Spracklen<sup>33</sup>, Michael  
8 Boehnke<sup>9</sup>, Marijana Vujkovic<sup>4,34,35</sup>, Jerome I. Rotter<sup>36</sup>, Decio L. Eizirik<sup>26</sup>, Miriam  
9 Cnop<sup>26,27,37</sup>#, Heiko Lickert<sup>22,23,38</sup>#, Andrew P. Morris<sup>16,10,39</sup>#†, Eleftheria Zeggini<sup>10,40</sup>#†, Benjamin  
10 F. Voight<sup>4,5,6,7</sup>†#, Josep M. Mercader<sup>1,2,3,29</sup>†#

## 11 Affiliations

12 <sup>1</sup>Programs in Metabolism and Medical and Population Genetics, Broad Institute of MIT and  
13 Harvard, Cambridge, MA, USA. <sup>2</sup>Diabetes Unit, Endocrine Division, Department of Medicine,  
14 Massachusetts General Hospital, Boston, MA, USA. <sup>3</sup>Center for Genomic Medicine,  
15 Massachusetts General Hospital, Boston, MA, USA. <sup>4</sup>Corporal Michael J. Crescenz VA Medical  
16 Center, Philadelphia, PA, USA. <sup>5</sup>Department of Systems Pharmacology and Translational  
17 Therapeutics, University of Pennsylvania Perelman School of Medicine, Philadelphia, PA, USA.  
18 <sup>6</sup>Department of Genetics, University of Pennsylvania Perelman School of Medicine,  
19 Philadelphia, PA, USA. <sup>7</sup>Institute for Translational Medicine and Therapeutics, University of  
20 Pennsylvania - Perelman School of Medicine, Philadelphia PA. <sup>8</sup>Department of Epidemiology,  
21 School of Public Health, Nanjing Medical University, Nanjing, China. <sup>9</sup>Department of  
22 Biostatistics and Center for Statistical Genetics, University of Michigan, Ann Arbor, MI, USA.  
23 <sup>10</sup>Institute of Translational Genomics, Helmholtz Zentrum München, German Research Center  
24 for Environmental Health, Neuherberg, Germany. <sup>11</sup>Graduate School of Experimental Medicine,  
25 Technical University of Munich, Munich, Germany. <sup>12</sup>ULB Center for Diabetes Research,  
26 Medical Faculty, Université Libre de Bruxelles, Brussels, Belgium. <sup>13</sup>Interuniversity Institute of  
27 Bioinformatics in Brussels (IB2), Brussels, Belgium. <sup>14</sup>Machine Learning Group, Université Libre  
28 de Bruxelles, Brussels, Belgium. <sup>15</sup>Diabetes and Inflammation Laboratory, Centre for Human  
29 Genetics, Nuffield Department of Medicine, University of Oxford, Oxford, United Kingdom.  
30 <sup>16</sup>Centre for Genetics and Genomics Versus Arthritis, Centre for Musculoskeletal Research,  
31 Division of Musculoskeletal and Dermatological Sciences, University of Manchester,  
32 Manchester, UK. <sup>17</sup>Department of Diabetes and Metabolic Diseases, Graduate School of  
33 Medicine, University of Tokyo, Tokyo, Japan. <sup>18</sup>Department of Statistical Genetics, Osaka  
34 University Graduate School of Medicine, Suita, Japan. <sup>19</sup>Center for Precision Health Research,  
35 National Human Genome Research Institute, National Institutes of Health, Bethesda, MD, USA.  
36 <sup>20</sup>British Heart Foundation Cardiovascular Epidemiology Unit, Department of Public Health and  
37 Primary Care, University of Cambridge, Cambridge, UK. <sup>21</sup>Heart and Lung Research Institute,  
38 University of Cambridge, Cambridge, UK. <sup>22</sup>Institute of Diabetes and Regeneration Research  
39 (IDR), Helmholtz Munich, Neuherberg, Germany. <sup>23</sup>German Center for Diabetes Research  
40 (DZD), Neuherberg, Germany. <sup>24</sup>Institute of Computational Biology (ICB), Helmholtz Munich,

41 Neuherberg, Germany. <sup>25</sup>School of Life Sciences Weihenstephan, Technical University of  
42 Munich, Freising, Germany. <sup>26</sup>ULB Center for Diabetes Research, Medical Faculty, Université  
43 Libre de Bruxelles, Brussels, Belgium. <sup>27</sup>Division of Endocrinology, Erasmus Hospital, Université  
44 Libre de Bruxelles, Brussels, Belgium. <sup>28</sup>Department of Medicine, Harvard Medical School,  
45 Boston, MA, USA. <sup>29</sup>Division of General Internal Medicine, Massachusetts General Hospital,  
46 Boston, MA, USA. <sup>30</sup>Wellcome Centre for Human Genetics, Nuffield Department of Medicine,  
47 University of Oxford, Oxford, UK. <sup>31</sup>Oxford Centre for Diabetes, Endocrinology and Metabolism,  
48 Radcliffe Department of Medicine, University of Oxford, Oxford, UK. <sup>32</sup>Oxford NIHR Biomedical  
49 Research Centre, Churchill Hospital, Oxford University Hospitals NHS Foundation Trust,  
50 Oxford, UK. <sup>33</sup>Department of Biostatistics and Epidemiology, University of Massachusetts  
51 Amherst, Amherst, MA, USA. <sup>34</sup>Department of Medicine, University of Pennsylvania Perelman  
52 School of Medicine, Philadelphia, PA, USA. <sup>35</sup>Department of Biostatistics, Epidemiology and  
53 Informatics, University of Pennsylvania Perelman School of Medicine, Philadelphia, PA, USA.  
54 <sup>36</sup>Institute for Translational Genomics and Population Sciences, Department of Pediatrics,  
55 Lundquist Institute for Biomedical Innovation at Harbor-UCLA Medical Center, Torrance, CA,  
56 USA. <sup>37</sup>WEL Research Institute, Wavre, Belgium. <sup>38</sup>School of Medicine, Technical University of  
57 Munich, Munich, Germany. <sup>39</sup>Estonian Genome Centre, Institute of Genomics, University of  
58 Tartu, Tartu, Estonia. <sup>40</sup>TUM School of Medicine and Health, Technical University of Munich and  
59 Klinikum Rechts der Isar, Munich, Germany. \*These authors contributed equally to this work.  
60 #These authors supervised this work. †Correspondence to: [rmandla@broadinstitute.org](mailto:rmandla@broadinstitute.org),  
61 [andrew.morris-5@manchester.ac.uk](mailto:andrew.morris-5@manchester.ac.uk), [eleftheria.zeggini@helmholtz-muenchen.de](mailto:eleftheria.zeggini@helmholtz-muenchen.de),  
62 [bvoight@upenn.edu](mailto:bvoight@upenn.edu), [mercader@broadinstitute.org](mailto:mercader@broadinstitute.org).

63

64

## 65 **Abstract**

66 Discerning the mechanisms driving type 2 diabetes (T2D) pathophysiology from genome-wide  
67 association studies (GWAS) remains a challenge. To this end, we integrated omics information  
68 from 16 multi-tissue and multi-ancestry expression, protein, and metabolite quantitative trait loci  
69 (QTL) studies and 46 multi-ancestry GWAS for T2D-related traits with the largest, most  
70 ancestrally diverse T2D GWAS to date.

71 Of the 1,289 T2D GWAS index variants, 716 (56%) demonstrated strong evidence of  
72 colocalization with a molecular or T2D-related trait, implicating 657 *cis*-effector genes, 1,691  
73 distal-effector genes, 731 metabolites, and 43 T2D-related traits. We identified 773 of these *cis*-  
74 and distal-effector genes using either expression QTL data from understudied ancestry groups  
75 or inclusion of T2D index variants enriched in underrepresented populations, emphasizing the  
76 value of increasing population diversity in functional mapping. Linking these variants, genes,  
77 metabolites, and traits into a network, we elucidated mechanisms through which T2D-  
78 associated variation may impact disease risk. Finally, we showed that drugs targeting effector  
79 proteins were enriched in those approved to treat T2D, highlighting the potential of these results  
80 to prioritize drug targets for T2D.

81 These results represent a leap in the molecular characterization of T2D-associated genetic  
82 variation and will aid in translating genetic findings into novel therapeutic strategies.

83

## 84 **Introduction**

85 Type 2 diabetes (T2D) and its associated complications are one of the biggest global health  
86 problems of the 21<sup>st</sup> century<sup>1,2</sup>. The biological mechanisms underlying T2D are not fully  
87 understood, yet expanding upon pathways for T2D could inform therapeutic approaches. It has  
88 been demonstrated that clinical trials of drugs that have genetic support are more likely to be  
89 successful and to be granted expedited development and review by the FDA<sup>3-6</sup>. Therefore, a

90 logical approach to accelerate development of new T2D drugs is through linking T2D-associated  
91 variants with their effector genes.

92  
93 One strategy to nominate potential disease effector genes is to identify rare variants that alter  
94 the protein coding sequence through putative loss-of-function (pLOF) or amino-acid altering  
95 variants<sup>7,8</sup>. While this approach has generated numerous leads<sup>9</sup>, discovery of rare coding  
96 variants associated with T2D has been limited by small sample sizes from available exome or  
97 genome sequencing studies, especially in underrepresented populations. In contrast, large-  
98 scale multi-ancestry array-based genome-wide association studies (GWAS) have been  
99 successful in identifying hundreds of genetic associations<sup>10-15</sup>. However, only 50 (4%) of the  
100 1,289 T2D-associated genetic variants from the latest T2D GWAS are themselves a pLOF or  
101 amino-acid altering variant<sup>15</sup>. Previous results have also suggested only 43% of T2D-associated  
102 protein-altering variants show evidence of causality after fine-mapping<sup>16</sup>, complicating efforts  
103 with this strategy alone to identify the effector genes underlying most T2D associations.  
104 Additionally, inference of the tissue of action, effect direction, and physiological mechanisms of  
105 T2D-associated variants are also important to translate these discoveries into mechanistic  
106 insights and novel drug targets.

107  
108 Many T2D variant-to-function efforts have attempted to determine these downstream targets  
109 through the identification of shared causal signals underlying both T2D and a single omics layer  
110 from a quantitative trait loci (QTL) analysis, with gene expression being the most common<sup>17-20</sup>.  
111 However, a recent GWAS for T2D could only map *cis*-effector genes for 21% of their signals  
112 when using transcriptomic and proteomic data<sup>11</sup>, motivating the pursuit of integrating larger and  
113 more ancestrally diverse molecular data to identify additional mechanisms. To date, few studies  
114 in T2D have attempted to jointly analyze transcriptomic, proteomic, and metabolomic data to link  
115 genetic variations to T2D biological pathways. Furthermore, there have been limited attempts to



116 explore the overlap of these functional genomics datasets with cardiometabolic trait-associated  
117 clusters for T2D<sup>15,21</sup> to better characterize the biology underlying T2D heterogeneity. More  
118 importantly, previous analyses have focused on populations genetically similar to European  
119 ancestry individuals from the 1000 Genomes Project (1000G), which we henceforth refer to as  
120 EUR-like, limiting our understanding of the biological downstream effects of T2D in other  
121 population groups such as those genetically similar to African ancestry (AFR-like), admixed-  
122 American (AMR-like), East Asian ancestry (EAS-like), and South asian ancestry (SAS-like).  
123

124 Here, we tested for colocalization between the largest, recently reported multi-ancestry T2D  
125 GWAS meta-analysis<sup>15</sup> with association datasets for transcriptomic, proteomic, and  
126 metabolomic traits to identify effector transcripts and downstream targets for T2D across  
127 multiple tissues and ancestry groups. Additionally, we used GWAS data from T2D-related traits,  
128 including glycemic, cardiometabolic, and anthropometric traits, to understand the physiological  
129 mechanisms linked to T2D-associated variation and to further characterize the heterogeneity of  
130 T2D loci. We found evidence of colocalization between T2D signals and molecular or T2D-  
131 related traits for the majority of the T2D signals, expanding the catalog of variant-to-gene  
132 mappings and physiologic correlates with disease. We combined these associations into an  
133 interactive network to define relationships between genetic variants, molecular trait data, and  
134 T2D-related traits, providing a resource to prioritize mechanisms and propose potential  
135 therapeutic hypotheses.

136

## 137 **Results**

### 138 ***Overall analysis strategy***

139 To understand molecular mechanisms and physiological mechanisms of T2D-associated  
140 genetic variation, we evaluated evidence of pairwise-colocalization between each of the 1,289  
141 T2D-associated index variants identified in Suzuki et al.<sup>15</sup> and *cis*-gene expression QTL from

142 diverse tissues and ancestries (eQTL, 10 datasets), protein QTL (*cis*- and *trans*-pQTL, 4  
143 datasets), metabolite QTL (metabQTL, 2 datasets), and T2D-related cardiometabolic trait  
144 GWAS (46 datasets; **Fig. 1a; Supplementary Tables 1 and 2; Methods**). We identified 12,180  
145 colocalizations with a posterior probability of a shared causal variant (PP.H4) > 0.8,  
146 corresponding to a total of 716 T2D index variants colocalizing with 657 *cis*-effector genes from  
147 an eQTL or *cis*-pQTL, 1,691 distal-effector genes from *trans*-pQTL, 731 metabolites, and 43  
148 T2D-related traits (**Fig. 1b, 1c; Supplementary Tables 3, 4, 5, and 6; Methods**).

149  
150 We represented the 12,180 colocalizations as a multi-layer colocalization network, where nodes  
151 represent T2D GWAS index variants, genes, metabolites, or traits, and edges represent a  
152 colocalization between T2D and eQTLs, pQTLs, metabQTLs or trait GWAS data (**Fig. 1a;**  
153 **Supplementary File**).

154

### 155 ***Identification of T2D cis-effector genes and their relevant tissues***

156 To identify candidate T2D effector genes and their tissues of action, we tested for evidence of  
157 colocalization between T2D and eQTL datasets from blood<sup>22,23</sup> and six T2D-related tissues:  
158 pancreatic islets<sup>19</sup>, subcutaneous and visceral adipose tissue, liver, hypothalamus, and skeletal  
159 muscle<sup>23</sup> (**Methods**). We observed 1,324 colocalizations, representing 632 candidate *cis*-  
160 effector genes, and 349 (27.1%) of the 1,289 T2D index variants. Of the 349 index variants, 110  
161 (32.0%) colocalized to different effector genes in different tissues, suggesting evidence of  
162 varying effects by tissue (**Supplementary Table 7**).

163

164 To quantify the improvement in our list of T2D effector genes, we compared our results to  
165 previous studies that performed colocalization analyses on different T2D GWAS<sup>11,14,19,24</sup>. We  
166 found that the present analysis doubles the number of candidate effector genes compared to  
167 the largest previous study<sup>14</sup>, owing to the larger sample size and diversity of the T2D GWAS,

168 and the new and larger eQTL datasets we employed (**Fig. 2a**). Indeed, the number of  
169 colocalizations per eQTL dataset was strongly correlated with the eQTL dataset sample size  
170 (Pearson  $r=0.79$ ,  $P=6.8\times 10^{-3}$ ), highlighting the importance of statistical power in colocalization  
171 analyses (**Extended Data Fig. 1**).

172  
173 We observed many colocalizations in a single tissue only (**Fig. 2b**) with pancreatic islets having  
174 the highest proportion of single-tissue observed colocalizations (0.50; **Fig. 2c**). One of the  
175 colocalizations only observed in pancreatic islets was with *SCTR*, a G-protein-coupled receptor  
176 in the same family as known T2D drug target *GLP1R* (**Fig. 2d**). *SCTR* is highly and specifically  
177 expressed in pancreatic islets<sup>19</sup> and is downregulated in pancreatic islets of T2D patients<sup>25</sup>,  
178 supporting the relevance of pancreatic islet expression of *SCTR* in T2D pathophysiology. *SCTR*  
179 also harbors a missense variant associated with lower T2D risk<sup>12,13</sup> that is enriched in EAS-like  
180 populations.

181  
182 To validate the candidate effector genes colocalizing with T2D in islets, we performed gene set  
183 enrichment analyses between differentially expressed T2D genes in islets and these effector  
184 genes stratified by the direction of effect for the T2D risk allele (**Supplementary Table 8**;  
185 **Methods**). We found that genes from colocalizations where decreased expression is associated  
186 with increased T2D risk are significantly enriched in genes downregulated in islets of T2D cases  
187 (Normalized Enrichment Score [NES]=-1.7;  $P=0.01$ ) (**Extended Data Fig. 2**). Enrichment only in  
188 the colocalizations where the risk allele reduces expression may indicate a large abundance of  
189 associations between diminished gene function and T2D risk.

190  
191 ***pQTL colocalization identifies additional cis and trans effector proteins***

192 To expand our identification of effector genes beyond eQTLs, we tested for evidence of  
193 colocalization between T2D and four pQTL datasets (plasma UKB, plasma deCODE, plasma

194 HELIC, and brain ROS/MAP). We identified 42 and 3,423 colocalizations with a *cis*-pQTL and  
195 *trans*-pQTL respectively, encompassing 1,728 unique genes and 365 (28.3%) T2D index  
196 variants.

197  
198 We identified most of the colocalizations (2,451, 70.7%) with pQTLs from the deCODE dataset,  
199 which had the second largest sample size but included more proteins, owing to the use of the  
200 Somascan panels (N=35,559; N<sub>proteins</sub>=4,907), compared with the OLINK panels employed by  
201 the UKB data (N=54,219, N<sub>proteins</sub>=1,472; **Fig. 3a**). We also observed 85 colocalizations with the  
202 HELIC data (N=2,933) and 7 with the ROS/MAP data (N=330). Despite differences in sample  
203 size and protein sets, we observed 37 identical colocalizations (all in *trans*) with deCODE and  
204 UKB pQTL datasets, which is 7.5-fold higher than expected by chance considering the overlap  
205 of proteins detected by both the Somascan and OLINK panels (Fisher's exact test  $P=7.4 \times 10^{-20}$ ;  
206 **Methods; Supplementary Table 9**). Among those 37, we found strong consistency of protein  
207 effect size estimates between deCODE and UKB (Pearson  $r=0.93$ ;  $P=9.1 \times 10^{-17}$ ; **Fig. 3b**). One  
208 example colocalization detected with both UKB and deCODE pQTL datasets was for CBLN4  
209 with T2D index variant rs1415287 in *trans*, within the *LYPLAL1* locus defined in Suzuki et al.<sup>15</sup>,  
210 where the risk allele associated with increased levels of CBLN4 (**Fig. 3c**). rs1415287  
211 additionally colocalized with IGFBP-1 in *trans* (**Fig. 3d**), with decreased IGFBP-1 levels  
212 associated with the T2D risk allele. A previous study found decreased CBLN4 and increased  
213 IGFBP-1 plasma levels after administering SGLT2 inhibitors, a class of T2D drugs which  
214 reduces glucose reabsorption within the proximal renal tubule, to participants of varying glucose  
215 tolerance<sup>26</sup>, mirroring our findings of increased CBLN4 and decreased IGFBP-1 levels with the  
216 T2D risk allele.

217  
218 We also identified 784 genes for which there was a pQTL colocalizing with more than one T2D  
219 index variant (**Extended Data Fig. 3a**). We ranked these genes based on the association

220 between the pQTL and T2D GWAS effect sizes across all index variants that colocalized with a  
221 given gene (**Supplementary Table 10, Methods**). Among the highest ranked genes, *IGFBP2*  
222 had 14 colocalizations with overall negative associations between T2D-associated index variant  
223 risk allele effect size and protein levels, supporting previously reported negative associations  
224 between IGFBP-2 levels and T2D incidence<sup>27</sup> (**Extended Data Fig. 3b**). Seven of these index  
225 variants (50%) have previously been classified as being involved in lipodystrophy-related  
226 pathways<sup>15</sup>, suggesting IGFBP-2 may be involved lipodystrophy-like T2D. In agreement with  
227 that, previous publications have found associations between increased IGFBP-2 and lower BMI,  
228 lower waist-hip ratio, and increased triglycerides<sup>28</sup> and decreased NAFLD risk<sup>29,30</sup>. Together,  
229 these results highlight the value of highly powered pQTL datasets in identifying biologically  
230 relevant effector genes.

231

### 232 ***Inclusion of understudied population datasets boosts effector gene identification***

233 In the latest multi-ancestry T2D meta-analysis, 289 index variants (22.4%) have a MAF half as  
234 large in EUR-like populations compared to other populations<sup>15</sup>, in total mapping to 615 effector  
235 genes from a previously-described T2D-relevant tissue eQTL colocalization or pQTL  
236 colocalization. However, identifying effector genes for variants enriched in underrepresented  
237 populations remains a challenge due to a lack of molecular data from the same population<sup>31</sup>. To  
238 quantify the extent to which including molecular data from underrepresented populations  
239 improves the discovery of effector genes, we tested for colocalization between blood eQTL  
240 datasets collected in self-reported African American (AA), Mexican American (MX), and Puerto  
241 Rican (PR) cohorts<sup>22</sup> and the EUR-like GTEx dataset with both the multi-ancestry T2D GWAS  
242 and with matched ancestry T2D GWAS containing only AFR-like participants within the USA or  
243 AMR-like participants. We identified 633 colocalizations with one of these eQTL datasets  
244 (47.8% of all eQTL colocalizations), representing 347 gene-to-variant mappings. We identified  
245 204 (58.8%) of the 347 blood eQTL mappings in the AA, MX, or PR eQTL datasets only, and 37

246 (10.7%) only in the EUR-like GTEx dataset (**Fig. 4a; Methods; Supplementary Table 11**). In  
247 total, adding the AA, MX, or PR eQTL data identified 158 additional T2D effector genes not  
248 identified with any of the tested EUR-like eQTL or pQTL datasets, highlighting the importance of  
249 collecting data from underrepresented populations, even when testing a tissue that is not  
250 directly relevant for T2D pathophysiology. We found that T2D index variants with a  
251 colocalization observed only with an AA, MX, or PR blood eQTL were more common in AMR-  
252 like participants and less common in EUR-like participants relative to T2D index variants with a  
253 colocalization observed only with the EUR-like GTEx blood eQTL dataset (**Fig. 4b;  $P=0.02$** ).  
254 These results suggest differences in statistical power due to allele frequency heterogeneity  
255 and/or varying linkage disequilibrium (LD) with the true causal variant may underly differential  
256 detection of colocalizations across ancestry groups.

257  
258 Two example colocalizations observed only in the MX blood eQTL data were with *LIN7A* and  
259 *ACSS3*, both with the same lead variant from colocalization analyses, rs10128882 (**Fig. 4c**).  
260 The LD between rs10128882 and the T2D GWAS index variant rs11114650 was different  
261 between ancestry groups, with the highest being in EAS-like individuals ( $r^2=0.89$ ) and the lowest  
262 in AFR-like individuals ( $r^2=0.02$ ), possibly reflecting differential LD to the true causal variant  
263 across populations. The T2D risk allele of rs11114650 has a frequency of 1.5% in gnomAD-  
264 defined European populations compared to 39% in gnomAD-defined African populations (**Fig.**  
265 **4d**) and is associated with decreased blood expression levels of *LIN7A* and *ACSS3* (**Fig. 4e**).  
266 *LIN7A*, mainly expressed in the brain, is involved in localizing, distributing, and maintaining  
267 channels and receptors at polarized cell membranes<sup>32</sup>, while *ACSS3* is highly expressed in  
268 brown adipose tissue and has been previously associated with insulin-resistant obesity-like  
269 phenotypes in mice<sup>33</sup>.

270

271 ***Identification of effector metabolites***

272 To understand the metabolic processes of T2D-associated genetic variation, we tested for  
273 colocalization between T2D GWAS and plasma metabQTL data from UKB and the METSIM  
274 study. We identified 5,221 metabQTL colocalizations, corresponding to 283 T2D index variants,  
275 with a majority of these colocalizations (4,480, 85.8%) with the UKB metabQTL data. This is  
276 expected given the larger sample size of the UKB data (N=114,999) compared to the METSIM  
277 data (N=6,136). Of the 18 metabolites measured in the METSIM Metabolon panel that could be  
278 mapped to metabolites in the UKB Nightingale panel, 7 colocalized with the T2D GWAS in both  
279 METSIM and UKB, an overlap greater than expected by chance (Fisher's exact test OR=26.2,  
280  $P=1.8 \times 10^{-7}$ ; **Methods; Supplementary Table 12**), suggesting good concordance between the  
281 two platforms for shared metabolites.

282  
283 To prioritize metabolites with the largest implication with T2D, we ranked metabolites by the  
284 number of T2D index variants with which they colocalize, and by the association of genetic  
285 effect sizes between T2D and metabolites across all the index variants that colocalized with  
286 each metabolite (**Fig. 5a; Supplementary Table 13; Methods**). We found consistent  
287 associations between the risk allele effects and expected metabolite levels, such as T2D risk  
288 alleles associated with increased glucose levels (**Fig. 5a, 5b**). Among less well-established  
289 metabolites, we found 10 colocalizations where the T2D risk alleles lowered phosphatidylcholine  
290 levels (**Fig. 5c**), consistent with higher phosphatidylcholine intake previously associated with  
291 lower risk of T2D<sup>34,35</sup>. A subnetwork of all phosphatidylcholine-linked colocalizations was  
292 enriched for metabolites known to be related to phosphatidylcholine metabolism, such as  
293 sphingomyelin ( $P_{adj.}=0.02$ ), cholines ( $P_{adj.}=2.4 \times 10^{-17}$ ), and polyunsaturated fatty acids (PUFAs)  
294 ( $P_{adj.}=0.02$ ; **Fig. 5d; Supplementary Table 14; Methods**). Within this subnetwork, SMPD1  
295 (sphingomyelin phosphodiesterase 1) protein levels also colocalized with 4 of the same 10 T2D  
296 index variants, including two detected in two plasma pQTL studies (UKB pQTL and deCODE  
297 pQTL for rs9987289 and UKB pQTL and HELIC pQTL for rs8107974), providing robustness to



298 these results. SMPD1 acts in the same biochemical pathways as phosphatidylcholine synthesis  
299 and, along with PUFAs, has previously been associated with diabetic complications including  
300 diabetic retinopathy<sup>36</sup>. Combined, these results highlight the role of phosphatidylcholine  
301 metabolic pathways in T2D.

302

303 ***Colocalization with T2D-related traits recapitulates previously described T2D genetic***  
304 ***clusters***

305 We next performed colocalization analyses between T2D and 46 T2D-related traits to shed light  
306 into distinct T2D pathophysiologic mechanisms. We identified 2,170 colocalizations, including  
307 521 (40.4%) of the T2D index variants and 43 traits.

308

309 Previously, Suzuki et al. grouped T2D index variants based on their associations with a smaller  
310 subset of 37 of these traits to define 8 distinct genetic T2D mechanistic clusters (Beta cell with  
311 positive proinsulin, Beta cell with negative proinsulin, Residual glycaemic, Body fat, Metabolic  
312 syndrome, Obesity, Lipodystrophy, Liver/lipid metabolism). Their analyses used a k-means  
313 clustering approach on the Z-scores of the T2D index variants from each of the 37 T2D-related  
314 trait GWAS<sup>15</sup>. We expanded on this work by assessing the proportion of T2D index variants per  
315 cluster which could be mapped to a colocalization between T2D and at least one of the 37 traits  
316 previously used for clustering. We found that the Obesity cluster had the highest number of  
317 variants confirmed by colocalization, with 163 (70%) of the 223 index variants colocalizing with  
318 at least one of the 37 traits, reflecting the large number of obesity-related traits considered  
319 during colocalization testing. The colocalizing trait patterns also largely recapitulated the single-  
320 variant association-derived clusters<sup>15</sup> (**Fig. 6a**, left panel).

321

322 We also tested the enrichment of eQTL colocalization from different tissues and metabQTL  
323 colocalizations in each of the clusters. We observed enrichment of subcutaneous adipose tissue

324 colocalizations with the Metabolic syndrome cluster ( $P=2.2\times 10^{-5}$ ) and of the pancreatic islet  
325 colocalizations with the Beta Cell +PI cluster ( $P=1.6\times 10^{-5}$ ; **Extended Data Fig. 4**;  
326 **Supplementary Table 15**). We also observed enrichment of fatty acid metabolites with the  
327 Lipodystrophy clusters ( $P=2.0\times 10^{-9}$ ), and of glycolysis related metabolites with the Beta Cell +PI  
328 cluster ( $P=4.7\times 10^{-9}$ ; **Extended Data Fig. 4**; **Supplementary Table 16**). When aligning effect  
329 allele directions and effect sizes, we again recapitulated cluster patterns from Suzuki et al.  
330 based on single variant lookups. The results mirror the effects between Obesity (largely same  
331 direction) and Metabolic Syndrome/Lipodystrophy (largely opposite direction) cluster SNPs  
332 across anthropometric and adipose traits<sup>15</sup> (**Fig. 6a**, right panel). As we restricted the analyses  
333 to loci that have evidence of colocalization, these results are more specific than those previously  
334 presented.

335  
336 Within each cluster, variants showed different patterns of colocalizations with different traits  
337 (**Fig. 6b**). For example, the two Beta Cell clusters have the bulk of their colocalizing variants  
338 linked to at least one glycaemic trait, while the variants in the Obesity cluster are linked to  
339 anthropometric, adipose, and lipids traits (**Extended Data Fig. 5**). In contrast, the Lipodystrophy  
340 cluster variants are more pleiotropic, with 19 of 27 variants linked to 4 or more trait groups,  
341 suggestive of heterogeneity within lipodystrophy-related variants (**Fig. 6c**).

### 342 343 ***Effector genes are enriched in drug targets for diabetes***

344 The prioritization of drugs targeting candidate genes can accelerate clinical translation<sup>5,37,38</sup>. We  
345 pulled known drugs which target one of the 2,311 genes identified from a *cis*-eQTL or a *cis*- or  
346 *trans*-pQTL colocalization (**Methods**). Among 1,964 gene-to-drug mappings, consisting of 665  
347 drugs listed as approved, not withdrawn and with information on disease indications, and 159 of  
348 our colocalizing genes (**Supplementary Table 17**).

349

350 We tested if drugs targeting any of these genes were enriched with an approved indication for  
351 diabetes. We observed a 3.5-fold enrichment for approved diabetes indication within drugs that  
352 target our list of effector genes ( $P=4.4\times 10^{-10}$ ; **Fig. 7a; Methods**) and a 2.0-fold enrichment for  
353 any diabetes indication within drugs targeting the effector genes ( $P=1.9\times 10^{-6}$ ; **Fig. 7b;**  
354 **Methods**), compared to all other drugs. We then performed the same analysis stratified by the  
355 source of colocalization, using lists of 1,681 genes identified only from a pQTLs (*cis* or *trans*),  
356 1,654 only from *trans* pQTLs, or 583 only from eQTLs. Drugs targeting pQTL-only identified  
357 genes were enriched for approved T2D drug targets (OR=2.4,  $P=3.4\times 10^{-4}$ ). Drugs targeting  
358 eQTL-only identified genes were the most enriched for approved drugs for diabetes (OR=3.9,  
359  $P=3.7\times 10^{-7}$ ). These results suggest that drugs targeting any of our candidate effector genes are  
360 potential candidates for repurposing to treat T2D. Permutation analyses similarly found  
361 significant enrichment for diabetes drugs among our genes relative to random sets of genes  
362 (**Extended Data Fig. 6; Methods**).

363  
364 Among the genes observed only from an eQTL colocalization, we identified *FXVD2* (**Fig. 7c**)  
365 which has been proposed as a pancreatic beta-cell specific biomarker<sup>39</sup>. *FXVD2* modulates  
366 Na,K-ATPase activity and cell proliferation<sup>40</sup> and is expressed at the early stages of the human  
367 endocrine pancreas development (15 weeks), preceding insulin detection<sup>39</sup>, suggesting a  
368 putative role in islet development. We also detected *FXVD2* mRNA expression at the end of the  
369 differentiation process of induced pluripotent stem cells into islet-like cells in both bulk and  
370 single-cell datasets<sup>28,41-43</sup> (**Extended Data Fig. 7**).

371  
372 The risk allele of the T2D index variant rs529623 was associated with lower expression of  
373 *FXVD2* in pancreatic islets<sup>19</sup> (**Fig. 7d**;  $P=3.4\times 10^{-7}$ ). We further explored expression differences  
374 of *FXVD2* in existing bulk RNA-seq<sup>44</sup> and single-cell RNA-seq<sup>45</sup> (scRNA-seq) from pancreatic

375 islets of human donors with and without T2D (**Methods**). After adjusting for multiple hypothesis  
376 testing, *FXVD2* was significantly downregulated in pancreatic islets of T2D patients (**Fig. 7e**)  
377 specifically within Beta cells<sup>45</sup> (**Fig. 7f**). There are currently five approved drugs that target  
378 *FXVD2* but are not approved for diabetes: delanoside, digoxin, digitoxin, acetyldigitoxin, and  
379 lanatoside. These drugs potentially could be modified to treat T2D, particularly if further  
380 preclinical investigations show indications that they can target and modulate beta cell function.

381  
382 We also found multiple other drugs targeting proteins for one of our effector genes which had  
383 clinical evidence to support a role in impacting glycemia and may represent possible targets for  
384 drug repurposing (**Supplementary Table 18**). For example, amisulpride, an antagonist for the  
385 Serotonin (5-HT) receptor encoded by *HTR6*, increases pancreatic insulin secretion in healthy  
386 controls<sup>46</sup>. We identified *HTR6* from a blood *trans*-pQTL colocalization where the T2D risk allele  
387 is associated with increased protein levels, consistent with amisulpride, which antagonizes  
388 *HTR6* and increases insulin secretion.

## 389 390 **Discussion**

391 T2D is a model for complex disease genetics owing to its high prevalence and polygenicity, with  
392 the largest T2D multi-ancestry meta-analysis to date based on >2.5 million participants,  
393 identifying 1,289 index variants<sup>15</sup>. However, understanding the function of associated variants  
394 from a GWAS is extremely challenging, and only few examples have provided additional  
395 insights into the molecular mechanisms underpinning signals<sup>47-51</sup>. These comprehensive studies  
396 take years to complete, and biological insights from previous studies were mostly described in  
397 EUR-like populations<sup>14,18,19,24</sup>, limiting findings for other populations in which T2D risk alleles are  
398 now being increasingly reported<sup>11,15</sup>.

399

400 Here, we aimed to create a catalog of effector genes, metabolites, and traits for the 1,289 T2D-  
401 associated index variants. We identified >12,000 colocalizations with T2D across all omics  
402 layers and T2D associated traits tested. We found *cis*-effector genes for 361 of the index  
403 variants (28%) and identified a >2-fold increase in the number of *cis*-effector genes compared  
404 with the previous largest T2D GWAS<sup>14</sup>. We observed many of the eQTL colocalizations in only  
405 one of the tissues tested, emphasizing the importance of including multiple tissue types in  
406 variant-to-function efforts for T2D. We also demonstrated the value of multi-ancestry eQTL data  
407 through the identification of 158 additional effector genes (24% of all *cis*-effector genes) using  
408 blood eQTL data from AA, PR, and MX populations<sup>22</sup> that we did not observe in eQTL or pQTL  
409 data from EUR-like populations alone. We demonstrate that even in blood, which is not directly  
410 related to T2D progression, including eQTL data from multiple ancestry groups improves  
411 effector gene discovery. Despite substantial progress in the inclusion of diverse ancestries in  
412 GWAS meta-analysis, the availability of molecular data from diverse ancestries remains  
413 limited<sup>31</sup>. We hope that the present findings will help motivate the generation of molecular QTL  
414 resources from participants of diverse ancestries to unveil additional effector genes and  
415 potential drug targets.

416  
417 We compiled the pairwise colocalizations between T2D and each omics layer and additional  
418 traits to create a network of T2D index variants mapped to genes, metabolites, and traits. This  
419 provides the most comprehensive resource to date of the genetic relationships between genes,  
420 traits, metabolites, and genetic variants associated with T2D to the research community. Such a  
421 resource allows searches for genes, metabolites, or traits of interest and find the T2D index  
422 variants underlying their shared causal signals with T2D to quickly generate hypotheses and  
423 gain insights into T2D pathophysiology. We additionally include effect and variant information  
424 from the molecular QTL, trait GWAS, and T2D GWAS summary statistics to further improve the  
425 searchability of the network.

426

427 Identifying drug targets for complex diseases has traditionally focused on protein coding  
428 variants, which involves designating the target gene and mimicking a loss-of-function or gain-of-  
429 function effect<sup>52,53</sup>. However, effector genes regulated by non-coding variants may also be  
430 viable drug targets once the mechanism of action is understood. In this study, we identified  
431 candidate effector genes, their tissue of action and direction of effect, for potential drug target  
432 identification. We show that our list of effector genes is enriched for targets of approved drugs  
433 for treatment of T2D, suggesting that drugs not currently used to treat diabetes but targeting one  
434 of the effector genes are strong candidates for modification for the treatment of T2D. We  
435 acknowledge that additional studies to test causality, druggability, and functional validation with  
436 tissue and cell types of interest are needed.

437

438 Our study has limitations. First, we utilized the 1,289 index variants from Suzuki et al. to define  
439 our tested colocalization regions, but we recognize that these variants were not assessed for  
440 statistical independence applying formal fine-mapping approaches. Second, we leveraged the  
441 multi-ancestry meta-analysis for T2D to maximize sample size. However, this approach may  
442 underestimate the true number of colocalizations, as we could not perform fine-mapping to  
443 differentiate multiple independent signals within the same locus due to current limitations in fine  
444 mapping and conditional analyses utilizing only multi-population summary statistics data. Third,  
445 confirmation of the tissue of action and the causality and directionality of the effect, especially  
446 for distal-effector genes, remains to be determined. This necessitates careful investigation  
447 through appropriate causal inference experiments, cellular models, and *in vivo* studies. To  
448 facilitate these efforts, we provide here the most extensive list of effector genes, tissues, and  
449 potential physiological pathways linked to T2D associated variation for initial prioritization  
450 strategies.

451

452 In conclusion, we present a comprehensive functional follow-up of the largest T2D GWAS meta-  
453 analysis and provide a framework model for functional annotation of other complex multi-  
454 ancestry GWAS. We provide an interactive network to explore the relationships between T2D-  
455 associated variants and genes, metabolites, and traits. We anticipate that this resource will  
456 serve as a valuable tool for generating testable hypotheses that may lead to the discovery of  
457 novel T2D drug targets and therapeutic strategies.

458

## 459 **Methods**

### 460 ***GWAS and Molecular Trait Associated Datasets***

461 We downloaded GWAS for T2D relevant traits downloaded from a variety of sources described  
462 in **Supplementary Table 1**<sup>54–70</sup>. We used T2D multi-group meta-analysis generated using  
463 METAL<sup>71</sup> from Suzuki et al.<sup>15</sup> for all colocalization analyses. Additionally, single population  
464 group meta-analyses using METAL from Suzuki et al. for AFR-like participants living within the  
465 USA and for AMR-like participants were used for colocalization. We removed variants with a  
466 MAF <0.5% across all the 1000G-continental similarity groups from the analyses.

467

468 We downloaded pancreatic Islet eQTL data from TIGER<sup>19</sup>. Since effect size and variance  
469 information is not available in the TIGER eQTL data, we used p-value information from the  
470 summary statistics and allele frequencies from UKB to calculate approximate bayes factors for  
471 colocalization analyses. We downloaded eQTL data for subcutaneous adipose, visceral  
472 adipose, skeletal muscle, hypothalamus, and liver tissue and blood from GTEx v8. We also  
473 tested eQTL data for whole blood from self-reported African American (AA), Mexican American  
474 (MX), and Puerto Rican (PR) populations for colocalization<sup>22</sup>. Additionally, we tested T2D  
475 GWAS including only AFR-like participants from the USA for colocalization with the AA blood  
476 eQTL data and tested T2D GWAS including only AMR-like participants for colocalization with  
477 the MX and PR blood eQTL datasets. We restricted the colocalization analyses to just these



478 eQTL datasets as pancreatic islets, subcutaneous adipose, visceral adipose, skeletal muscle,  
479 hypothalamus, and liver are known to be relevant to T2D. Despite blood representing multiple  
480 tissues and not being a target of T2D, the availability of blood eQTL from diverse populations  
481 motivated their inclusion.

482  
483 We performed integration with pQTL data using summary statistics from deCODE, UKB, HELIC,  
484 and ROS/MAP. The deCODE pQTL study contains 4,907 aptamers measured with the  
485 SomaScan version 4 assay (SomaLogic) in the plasma samples of 35,559 Icelanders<sup>72</sup>. The  
486 UKB Pharma Proteomics Project characterized 2,941 plasma protein analytes of 54,219 UKB  
487 participants using the antibody-based Olink Explore 3072 proximity extension assay and tested  
488 for pQTL with 2,923 proteins<sup>73</sup>. pQTL for only 1,472 of these proteins were available at the time  
489 of this study. Plasma pQTL from the Hellenic Isolated Cohorts (HELIC)<sup>74</sup> included 2,933  
490 samples from two isolated Greek populations (Pomak and the Mylopotamos villages) and 543  
491 proteins from six different OLINK panels: Cardiovascular II, Cardiovascular III, Metabolism,  
492 Neurology, Neuro-exploratory and Cardiometabolic<sup>75-77</sup>. Genetic and proteomic data from post-  
493 mortem samples of the dorsolateral prefrontal cortex of older adults was provided by the  
494 Religious Orders Study (ROS) and Rush Memory and Aging Project (MAP)<sup>78</sup>. The pQTL  
495 analysis was conducted for every HapMap3 common variant (MAF >0.05) within a 100 Kb  
496 window around protein-coding genes.

497  
498 For the colocalization analyses with metabolites, we used summary statistics from the METSIM  
499 and UKB cohorts. The METSIM metabolomics study measured 1,391 plasma metabolites in  
500 6,136 Finnish men using the Metabolon Discovery HD4 mass spectrometry platform<sup>79</sup>. In the  
501 UKB cohort, a total of 249 metabolites (168 absolute levels and 81 derived ratios and  
502 percentages) were measured from the Nightingale panel and tested for genome-wide  
503 associations with 114,999 individuals of European ancestry<sup>80</sup>.

504

### 505 **Colocalization Analyses**

506 We performed pairwise colocalizations between the multi-group T2D GWAS meta-analysis and  
507 eQTL, pQTL, metabQTL, and relevant trait GWAS datasets using the *coloc.abf* function from  
508 the *coloc*<sup>81</sup> package in R. *coloc.abf* requires regions to be specified to test for colocalization. To  
509 define these regions, index variants were sorted by p-value and a 500 Kb window was  
510 constructed around each variant. If a less significant index variant was within the window of a  
511 more significant variant, the less significant variant's window was removed from the list of  
512 regions. To prevent additional overlap of regions, any regions overlapping by more than 200 Kb  
513 were merged and regions overlapping by less than 200 Kb were split by half of their overlap  
514 size. The final region boundaries used in the analyses can be found in **Supplementary Table 2**.  
515 A colocalization analysis was performed between a T2D region and a QTL or cardiometabolic  
516 trait if and only if there was evidence of an association (defined as  $P < 1 \times 10^{-4}$ ) of the T2D index  
517 variant or a proxy for the T2D index variant for that trait. Proxy variants were defined as a  
518 variant in strong linkage disequilibrium (LD,  $r^2 > 0.8$ ) in all continental population groups defined  
519 by in 1000G (AFR, AMR, EAS, EUR, and SAS).

520

521 *coloc.abf* provides the posterior probability that a region shares a causal variant in both  
522 association summary statistics tested and posterior probabilities that each variant present in  
523 both summary statistics is the causal variant. A colocalization was deemed of interest if the  
524 posterior probability or shared variation (PP.H4) was greater than 0.8. To determine if a T2D  
525 GWAS index variant is the most likely shared causal variant for a region in two colocalizing  
526 datasets, the variant with the highest posterior probability of being shared was mapped to a  
527 index variant if it was in partial-to-strong LD with the index variant ( $r^2 > 0.5$ ) in 1000G population  
528 groups described above.

529

530 We labelled an eQTL colocalization as being observed in one tissue or population group dataset  
531 if the PP.H4 was greater than 0.8 in the dataset, but less than 0.3 in all other tissue or  
532 population group datasets. A maximum of 0.3 was chosen to avoid selecting suggestive  
533 colocalizations that may exist but not be sufficiently powered to be detected with our datasets.  
534 For single tissue analyses, we combined subcutaneous adipose and visceral omentum adipose  
535 results and combined blood results from each ancestry due to the larger similarities in gene  
536 expression profiles between these datasets relative to the other tissues analyzed.

537  
538 We characterized pQTL colocalizations as being in *cis* if the mapped index variant was within 1  
539 Mb of the pQTL gene TSS; otherwise they were denoted as in *trans*. We tested for enrichment  
540 of colocalizations identified between deCODE pQTL which uses the Somascan assay and UKB  
541 pQTL which uses the Olink assay, using Fisher's exact test. We constructed contingency tables  
542 from all gene to T2D index variant mappings possible for genes included in Somascan and/or  
543 Olink respectively. We also used this approach to test for an enrichment of colocalizations  
544 identified between METSIM metabQTL and UKB metabQTL, using all metabolite to T2D index  
545 variant mappings possible for metabolites included in METSIM and/or UKB respectively.

546  
547 We also tested for enrichment between T2D index variants mapped to an eQTL tissue  
548 colocalization and T2D index variants within different T2D genetic clusters using Fisher's exact  
549 test. We constructed contingency tables based on whether one of the 1,289 T2D index variants  
550 is within a specific T2D genetic cluster and is also the lead colocalizing variant for a  
551 colocalization with an eQTL dataset. The Liver/Lipid Metabolism cluster was excluded due to  
552 only having 3 total T2D index variants. We then adjusted P-values using the Benjamini-  
553 Hochberg procedure. We repeated these enrichments analyses for UKB metabQTL  
554 colocalizations, grouped based on metabolite class.

555

556 ***Colocalization Network***

557 We constructed a network of all the colocalizations with the T2D meta-analyses using  
558 cytoscape<sup>82</sup> and measured network properties using cytoNCA.

559

560 ***Effect Direction Consistency***

561 We mapped many of the genes and metabolites identified from a pQTL or metabQTL dataset to  
562 multiple T2D index variants. We then measured the consistency of effect estimates for T2D and  
563 the pQTL or metabQTL for genes or metabolites with at least 3 mapped T2D index variants by  
564 testing for an association between pQTL or metabQTL effect sizes with T2D effect sizes using  
565 an ordinary least squares regression model without an intercept, adjusting for an FDR of 0.05  
566 using the Benjamini-Hochberg procedure.

567

568 ***Expression Dataset Preparation***

569 We downloaded scRNA-seq data from HPAP<sup>45</sup> analyzed it with Scanpy<sup>83</sup> v1.9.3. The published  
570 data from HPAP we used in this study was pre-QC'ed, clustered, and annotated, and a full  
571 description of the HPAP data processing steps can be found in their publication<sup>45</sup>. Briefly, cells  
572 were filtered to have >500 expressed genes per cell and <15% mitochondrial reads. After,  
573 ambient RNA was adjusted using SoupX, followed by batch correction with Harmony and  
574 clustering using the Leiden algorithm with a resolution of 0.5. Cell types were defined by  
575 pseudo-bulking each cell type and identifying marker genes identified with a Wald test. We  
576 subset cells from healthy and T2D donors and created pseudobulks per sample by summing  
577 raw counts across cells per cell-type. We only kept pseudobulks with at least  $5 \times 10^5$  counts and  
578 from adult individuals (age  $\geq 20$  years; N=21 for healthy and N=17 for T2D). We performed the  
579 DE analysis with edgeR<sup>84</sup> v3.40.2. We removed lowly expressed genes per cell-type with  
580 filterByExpr, which removes genes with less than 10 counts in 10 samples or 15 counts in all  
581 samples, using diabetes status as a stratification covariate. After filtering, we tested a total of

582 9,995 genes in acinar cells, 8,150 genes in active stellate cells, 13,171 genes in alpha cells,  
583 13,095 genes in beta cells, and 9,422 genes in ductal cells. We then fit a generalized linear  
584 model with robust dispersion to the data, using as covariates diabetes status, age, sex, sex and  
585 age interaction, self-reported race and ethnicity, and sequencing chemistry. We next used the  
586 glmLRT function to identify T2D differentially expressed genes incorporating the dispersion  
587 estimates and adjusted the p-values with the Benjamini-Hochberg procedure.

588

589 We pulled bulk expression dataset for human islets from Marselli et al.<sup>44</sup>, including 28 T2D  
590 cases and 58 ND controls. We performed transcript quantification using salmon 1.4.0<sup>85</sup>, and  
591 differential expression tests using DESeq2 1.38.3<sup>86</sup>. The DESeq2 results from this study are  
592 accessible on GEO under accession number GSE159984.

593

594 We downloaded bulk expression data of *FXRD* from different iPSC differentiation stages from  
595 GEO under the accession number GSE190727. We also downloaded single-cell expression  
596 data for stem-cell-derived endocrine cells from Krentz et al. 2018<sup>42</sup>, Xin et al. 2018<sup>28</sup>, and  
597 Balboa et al. 2022<sup>43</sup>.

598

### 599 ***Open Targets Drug Identification***

600 To identify potential drug repurposing options from our candidate gene list, we queried data files  
601 from Open Targets<sup>87</sup> on around 7k drug molecules and around 62k targets, where 4,930 drugs  
602 were annotated with 1,538 gene targets. After also retrieving the reported indications of drugs,  
603 we refined our search to the approved drugs, which were not withdrawn and did list indications.  
604 Open Targets used drug annotations from ChEMBL to define drugs as being approved for an  
605 indication if they come from a source of approved drug information (e.g. FDA, WHO ATC, EMA,  
606 BNF). To test if diabetes drugs were identified more often than expected by chance, we  
607 compared the drugs targeting our query genes and those targeting all documented non-query

608 genes using chi-squared tests. Additionally, we tested if permuted 100k random samples from  
609 the same gene list would identify diabetes drug targets at the same rate, sampling 42,539  
610 known genes with HGNC gene symbols and comparing the results from our query gene set and  
611 the random samples.

612

### 613 **Acknowledgement**

614 A.H. is supported by the American Diabetes Association grant #11-23-PDF-35. O.B. has  
615 received funding from the European Union's Horizon 2020 research and innovation programme  
616 under Grant Agreement No 101017802 (OPTOMICS). A.P. is supported by the Wiener-Anspach  
617 Foundation, and the Fonds National de la Recherche Scientifique (FNRS). J.B.M is supported  
618 by NIDDK (U01DK078616 and R01DK078616). J.M.M. is supported by American Diabetes  
619 Association Innovative and Clinical Translational Award 1-19-ICTS-068, American Diabetes  
620 Association grant #11-22-ICTSPM-16, by NHGRI (U01HG011723), NIDDK (UM1-DK078616)  
621 and Medical University of Bialystok (MUB) grant from the Ministry of Science and Higher  
622 Education (Poland). This study also supported in part by the National Center for Advancing  
623 Translational Sciences, CTSI grant UL1TR001881, and the National Institute of Diabetes and  
624 Digestive and Kidney Disease Diabetes Research Center (DRC) grant DK063491 to the  
625 Southern California Diabetes Endocrinology Research Center. Infrastructure for the CHARGE  
626 Consortium is supported in part by the National Heart, Lung, and Blood Institute (NHLBI) grant  
627 R01HL105756. This research was conducted in part using data and resources from the  
628 Framingham Heart Study of the National Heart Lung and Blood Institute of the National  
629 Institutes of Health and Boston University School of Medicine. The Framingham Heart Study  
630 (FHS) acknowledges the support of contracts NO1-HC-25195, HHSN268201500001I and  
631 75N92019D00031 from the National Heart, Lung and Blood Institute and grant supplement R01  
632 HL092577-06S1 for this research. We also acknowledge the dedication of the FHS study  
633 participants without whom this research would not be possible.

634

635 **Disclosures**

636 J.B.M is an academic associate for Quest Diagnostics Inc. Endocrine R&D. MIMcC is now an  
637 employee of Genentech and a holder of Roche stock.

638

639 **Contributions**

640 R.M. Performed eQTL colocalization analyses, integrated all the colocalization results, built the  
641 omics network, and characterized the network. Lead the writing of the manuscript and design of  
642 figures. Lead the interpretation and discussion of the results, deep dives into specific locus and  
643 wrote the paper.

644 K.M.L. Contributed to design the colocalization pipeline. Performed colocalization analyses with  
645 GWAS traits. Integrated the colocalization results with the previously described T2D genetic  
646 clusters. Contributed to interpretation and discussion of the results, deep dive into specific  
647 locus, design of the figures, discussion of the narrative and writing of the paper.

648 X.Y. Performed colocalization analyses with deCODE pQLT, UKB pQLT, METSIM metabQTL.  
649 Contributed to interpretation and discussion of the results, deep dive into specific locus, design  
650 of the figures, discussion of the narrative and writing the paper.

651 O.B. Performed colocalization analyses with UKB metabQLT. Supervised the enrichment  
652 analyses of drug targets using open targets data. Contributed to interpretation and discussion of  
653 the results, deep dive into specific locus, design of the figures, discussion of the narrative and  
654 writing of the paper.

655 A.H. Performed colocalization analyses with blood eQTLs from diverse ancestries. Identified  
656 and evaluated the contribution of eQTL data from diverse ancestries in identifying effector  
657 genes as well as the value of using ancestry-specific GWAS meta-analysis in improving the  
658 identification of effector genes. Contributed to interpretation and discussion of the results, deep  
659 dive into specific locus, design of the figures, discussion of the narrative and writing the paper.



660 A.L.A Performed colocalization analyses with ROSMAP and HELIC pQLT. Contributed to  
661 interpretation and discussion of the results, deep dive into specific locus, design of the figures,  
662 discussion of the narrative and writing the paper.

663 A.P. Performed the analysis of differential expression in pancreatic islets in T2D and controls  
664 and islets in lipoglucotoxic conditions. Performed enrichment analyses of colocalization genes  
665 with differentially expressed genes. Contributed to interpretation and discussion of the results,  
666 deep dive into specific locus, design of the figures, discussion of the narrative and wrote the  
667 paper.

668 S.H. Performed the curation and mapping of effector genes to drugs using open targets data.  
669 Performed the enrichment analyses of effector genes with drug targets. Contributed to  
670 interpretation and discussion of the results, design of the figures, discussion of the narrative and  
671 writing of the paper.

672 K.Y, K.Hr, Y.T., M.L., H.L, M.C, D.L.E. provided and analyzed functional genomics data related  
673 from single-cell and pancreatic islets with the FXVD2 locus.

674 L.S., K.S., K.Ha., H.J.T, N.W.R., J.B.M, MIMcC, A.M., M.U., C.N.S, M.B, M.V, J.I.R. and A.P.M  
675 Provided feedback throughout the project and revised the paper.

676 R.M., A.P.M, B.V., E.Z and J.M.M conceived and planned the study, supervised and  
677 coordinated the analyses, and wrote the manuscript.

678

## 679 **Figure Legends**

680 **Figure 1: Overview of Project. a)** Genomic regions containing the 1,289 T2D-associated index  
681 variants from Suzuki et al.<sup>15</sup> were tested for evidence of colocalization with 10 eQTL datasets, 4  
682 pQTL datasets, 2 metabQTL datasets, and 46 related trait GWAS. Colocalizations were then  
683 mapped to an interactive network to visualize genes (from an eQTL or pQTL, colored green),  
684 metabolites (colored orange), or traits (colored purple) with evidence of sharing a causal variant  
685 with T2D around a index variant (colored yellow). These results were then used in downstream

686 analyses to identify enrichment with expression datasets, better understand T2D pathways, and  
687 identify drug targets for T2D. **b)** Upset plot of the 716 T2D index variants mapped to an  
688 association in an eQTL, pQTL, metabQTL, or trait GWAS dataset (with a colocalization PP.H4  
689 >0.8, Methods). **c)** Bar plot of the number of effector genes, metabolites, and traits identified  
690 from colocalization analyses with T2D.

691 **Figure 2: Identification of putative effector genes for T2D.** **a)** Plotted are the number of  
692 effector genes for T2D previously identified from colocalization analyses between various T2D  
693 GWAS and eQTL datasets. Colors indicate the tissue type of the eQTL dataset and shape  
694 indicates major self-reported population group of the eQTL dataset. Gray bars represent the  
695 total number of unique transcripts across all colocalization analyses per GWAS. **b)** Upset plot of  
696 the variant to gene mappings identified in each eQTL dataset analyzed. **c)** Proportion of  
697 colocalizations with evidence in one tissue (PP.H4 >0.8) and no positive evidence observed in  
698 other tissues (PP.H4 <0.3). **d)** Example of a colocalization observed only in Pancreatic Islets,  
699 for the gene *SCTR*. Colors indicate LD in EUR populations from 1000G relative to rs2244214.

700 **Figure 3: pQTL colocalizations identified in multiple datasets.** **a)** Upset plot of variant to  
701 gene mappings identified via colocalization analyses with four different pQTL datasets. **b)**  
702 Correlation of pQTL effect sizes for colocalizations identified in both UKB and deCODE pQTL  
703 datasets (Pearson R=0.93; P=9.1×10<sup>-17</sup>). **c)** Locus compare plot of *CBLN4* using deCODE  
704 pQTL data. **d)** Colocalization subnetwork of rs1415287, containing the colocalizations with  
705 *CBLN4* as well as a colocalization with *IGFBP-1*. Green nodes represent genes from an eQTL  
706 or pQTL, orange nodes represent metabolites, purple nodes represent traits, and yellow nodes  
707 represent T2D index variants. Size of the nodes indicate the number of colocalizations observed  
708 in the full network. Gray edges represent colocalizations with a plasma/blood dataset, green  
709 edges represent colocalizations with a subcutaneous adipose eQTL dataset, and pink edges  
710 represent colocalizations with a trait. Dashed lines indicate colocalizations are in the opposite

711 direction as T2D risk and solid lines indicate colocalizations are in the same direction as T2D  
712 risk.

713 **Figure 4: eQTL from understudied populations identify novel colocalizations with T2D. a)**

714 Upset plot of colocalizations identified with blood eQTL datasets from four different populations.

715 Orange bars represent colocalizations observed only in the Puerto Rican (PR), Mexican

716 American (MX), or African American (AA) datasets (PP.H4 >0.8) and not in the European (EUR)

717 dataset (PP.H4 <0.3). Blue bars represent colocalizations observed only in the EUR dataset

718 (PP.H4 >0.8) and not in PR, MX, or AA datasets (PP.H4 <0.3). Gray bars represent

719 colocalizations observed in any of the PR, MX, or AA datasets and showed a PP.H4 between

720 0.3 and 0.8 in the European dataset, or were observed in the European dataset but showed a

721 PP.H4 between 0.3 and 0.8 in any of the PR, MX, or AA datasets. **b)** Log-fold change of allele

722 frequencies between AMR-like and EUR-like populations for T2D index variants with a

723 colocalization observed in one population group. **c)** Locus compare plots of *LIN7A* and *ACSS3*

724 with MX data. Colors indicate LD in AMR continental ancestry from 1000G relative to variant

725 rs10128882. **d)** Allele frequencies of lead colocalizing variant rs10128882 (blue) and T2D index

726 variant rs11114650 (black) per continental ancestry and per inferred local ancestry among AMR

727 participants from gnomAD v4.0. **e)** Effect sizes of rs10128882 (blue) and rs11114650 (black) in

728 both the T2D GWAS and blood eQTL datasets, stratified by ancestry.

729 **Figure 5: Phosphatidylcholine has consistent negative effect directions with T2D risk. a)**

730 Joint scatterplot of metabolites comparing the number of T2D-associated index variants they are

731 mapped to compared to the change in T2D effect size per change in metabQTL effect size

732 across the variants. Points are colored and sized by Benjamoni-Hochberg adjusted p-value. **b)**

733 Increased glucose has consistent correlation with increased T2D risk at colocalizing index

734 variants. **c)** Decreased phosphatidylcholine has consistent correlation with decreased T2D risk

735 at index variants. **d)** Subnetwork of all colocalizations mapped to a Phosphatidylcholine-mapped

736 T2D-associated index variant. Green nodes represent genes from an eQTL or pQTL, orange

737 nodes represent metabolites, purple nodes represent traits, and yellow nodes represent T2D  
738 index variants. Size of the nodes indicate the number of colocalizations observed in the full  
739 network.

740 **Figure 6: Type 2 Diabetes Clusters Match Trait Colocalizations. a) left panel:** Color  
741 indicates the percentage of total SNPs with a colocalization in each cluster; each row was a trait  
742 used for clustering. Final rows list total number of SNPs in each cluster and the total % of SNPs  
743 in the cluster with at least one colocalization. **right panel:** Color indicates the percentage of  
744 colocalizing SNPs who have the same (red) or opposite (blue) effect direction as the linked T2D  
745 SNP, with white indicating that SNPs are split 50/50 for direction, and gray indicating there were  
746 no colocalizations between that trait and any SNPs in that cluster. Text in each square indicates  
747 the total number of SNPs in that cluster that colocalize with that trait. **b)** Upset plot of all  
748 colocalizing SNPs with 2 or more trait group colocalizations showing trait group overlaps, with  
749 bars colored by cluster membership. **c)** Upset plot showing trait group overlaps for colocalizing  
750 SNPs in the lipodystrophy cluster, with gold bars highlighting overlaps that include 4 or more  
751 trait groups (n=19 out of 27 colocalizing SNPs).

752 **Figure 7: Identification of novel drug targets for T2D. a)** Forest plot of chi2 enrichment  
753 results between drugs targeting colocalizing genes identified in at least one dataset (all), only  
754 from an eQTL, only from a pQTL, and only from a *trans*-pQTL with drugs having an approved  
755 indication of diabetes in Open Targets. **b)** Forest plot of enrichment results using drugs having  
756 an indication of diabetes. **c)** Locus compare plot of *FXVD2*, identified from a colocalization  
757 observed only with pancreatic islet eQTL data. **d)** Violin plot of *FXVD2* expression per rs529623  
758 genotype. **e)** Violin plot of *FXVD2* expression among people with T2D and non-diabetes (ND)  
759 stratified by weight status in bulk pancreatic islet data. **f)** Violin plot of *FXVD2* expression from  
760 human donor single-cell pancreatic islet data stratified by cell-type. Adjusted P-values <0.001  
761 are indicated with “\*\*\*”, and adjusted P-values <0.05 with “\*\*”. Due to the low number of cells per  
762 sample, the differential expression test was not performed for some cell types (**Methods**).

763

764 **Extended Data Figure 1: eQTL colocalizations correlate with sample size.** Scatter plot of  
765 the number of colocalizations between the T2D multi-ancestry meta-analysis and different eQTL  
766 datasets compared to the sample size of the eQTL datasets.

767 **Extended Data Figure 2: Enrichment of pancreatic islet colocalizing effector transcripts**  
768 **in differential gene expression data.** GSEA plots of colocalizing effector transcripts with  
769 differentially expressed genes from the bulk human pancreatic islet dataset, stratified by  
770 whether the T2D index variant risk allele is associated with increases (same direction) or  
771 decreases (opposite direction) of gene expression.

772 **Extended Data Figure 3: IGFBP2 associations with T2D are highly consistent genome-**  
773 **wide. a)** Joint scatterplot of proteins comparing the number of T2D-associated index variants  
774 they are mapped to compared to the association of pQTL effect sizes to T2D effect sizes across  
775 the variants. Points are colored and sized by Benjamoni-Hochberg adjusted p-value. **b)**  
776 Decreased plasma protein levels of insulin growth factor binding protein 2 *IGFBP2* has  
777 consistent correlation with increased T2D risk at colocalizing lead variants.

778 **Extended Data Figure 4: Overlap of T2D clusters with trait, eQTL, and metabQTL**  
779 **colocalizations.** Heatmaps of the percent of index variants per cluster mapped to a  
780 colocalization with a metabolite group, eQTL dataset, and additional related trait GWAS.

781 **Extended Data Figure 5: Colocalizations between index variants and trait groups per T2D**  
782 **genetic cluster.** Upset plots of colocalizations between T2D index variants from different T2D  
783 genetic clusters with related cardiometabolic trait groups.

784 **Extended Data Figure 6: Permutations of overlaps from T2D colocalizing genes with**  
785 **drugs from Open Targets.** Ratios of approved diabetes drugs of detected drugs compared to  
786 100k random samples (histogram) for a) genes from all T2D colocalizations, b) genes only  
787 identified from a T2D colocalization with eQTL, c) genes only identified from a T2D colocalization  
788 with pQTL, and d) genes only identified from a T2D colocalization with *trans*-pQTL. P-values

789 indicate difference in the approved proportion of diabetes indications per drug for colocalizing  
790 query genes relative to random permutations.

791 **Extended Data Figure 7: *FXVD2* expression in islet progenitor cells. a)** Heatmap of *FXVD2*  
792 expression throughout various stages of iPSC differentiation into beta-like cells, where colors  
793 correspond to the  $\log_2(\text{TPM}+1)$  expression level of an individual sample (1-5). The differentiation  
794 stages include definitive endoderm (DE), pancreatic progenitor (PP), stem cell-derived islets at  
795 stage 7 (SC-islets) and the islets following grafting into immune deficient mice for 4 months  
796 (graft). **b)** Dot plot showing mean gene expression of *FXVD2* and *INS* in the endocrine cell  
797 clusters in the integrated dataset of 46,261 stem-cell-derived endocrine cells and adult human  
798 islet cells (Krentz et al. 2018, Xin et al. 2018, and Balboa et al. 2022). Dot size is relative to the  
799 fraction of cells within a cluster expressing the gene. Endocrine Prog., Endocrine progenitors;  
800 SC-EC, Stem-cell-derived enterochromaffin-like cells; SC-Beta, Stem-cell-derived beta cells;  
801 SC-Alpha, Stem-cell-derived alpha cells.

802

- 803 1. Herman, W. H. & Zimmet, P. Type 2 Diabetes: An Epidemic Requiring Global Attention and  
804 Urgent Action. *Diabetes Care* **35**, 943–944 (2012).
- 805 2. Jaacks, L. M., Siegel, K. R., Gujral, U. P. & Narayan, K. M. V. Type 2 diabetes: A 21st  
806 century epidemic. *Best Pract. Res. Clin. Endocrinol. Metab.* **30**, 331–343 (2016).
- 807 3. Rusina, P. V. *et al.* Genetic support for FDA-approved drugs over the past decade. *Nat.*  
808 *Rev. Drug Discov.* **22**, 864–864 (2023).
- 809 4. Minikel, E. V., Painter, J. L., Dong, C. C. & Nelson, M. R. Refining the impact of genetic  
810 evidence on clinical success. *Nature* 1–6 (2024) doi:10.1038/s41586-024-07316-0.
- 811 5. Duffy, Á. *et al.* Development of a human genetics-guided priority score for 19,365 genes and  
812 399 drug indications. *Nat. Genet.* **56**, 51–59 (2024).
- 813 6. Wang, X. *et al.* The impact on clinical success from the 23andMe cohort.  
814 2024.06.17.24309059 Preprint at <https://doi.org/10.1101/2024.06.17.24309059> (2024).

- 815 7. Karczewski, K. J. *et al.* Systematic single-variant and gene-based association testing of  
816 thousands of phenotypes in 394,841 UK Biobank exomes. *Cell Genomics* **2**, (2022).
- 817 8. Wang, Q. *et al.* Rare variant contribution to human disease in 281,104 UK Biobank exomes.  
818 *Nature* **597**, 527–532 (2021).
- 819 9. Flannick, J. *et al.* Exome sequencing of 20,791 cases of type 2 diabetes and  
820 24,440 controls. *Nature* **570**, 71–76 (2019).
- 821 10. Mahajan, A. *et al.* Fine-mapping type 2 diabetes loci to single-variant resolution using high-  
822 density imputation and islet-specific epigenome maps. *Nat. Genet.* **50**, 1505–1513 (2018).
- 823 11. Mahajan, A. *et al.* Multi-ancestry genetic study of type 2 diabetes highlights the power of  
824 diverse populations for discovery and translation. *Nat. Genet.* **54**, 560–572 (2022).
- 825 12. Spracklen, C. N. *et al.* Identification of type 2 diabetes loci in 433,540 East Asian individuals.  
826 *Nature* **582**, 240–245 (2020).
- 827 13. Suzuki, K. *et al.* Identification of 28 new susceptibility loci for type 2 diabetes in the  
828 Japanese population. *Nat. Genet.* **51**, 379–386 (2019).
- 829 14. Vujkovic, M. *et al.* Discovery of 318 new risk loci for type 2 diabetes and related vascular  
830 outcomes among 1.4 million participants in a multi-ancestry meta-analysis. *Nat. Genet.* **52**,  
831 680–691 (2020).
- 832 15. Suzuki, K. *et al.* Genetic drivers of heterogeneity in type 2 diabetes pathophysiology. *Nature*  
833 1–11 (2024) doi:10.1038/s41586-024-07019-6.
- 834 16. Mahajan, A. *et al.* Refining the accuracy of validated target identification through coding  
835 variant fine-mapping in type 2 diabetes. *Nat. Genet.* **50**, 559–571 (2018).
- 836 17. Broadaway, K. A. *et al.* Loci for insulin processing and secretion provide insight into type 2  
837 diabetes risk. *Am. J. Hum. Genet.* **110**, 284–299 (2023).
- 838 18. Viñuela, A. *et al.* Genetic variant effects on gene expression in human pancreatic islets and  
839 their implications for T2D. *Nat. Commun.* **11**, 4912 (2020).



- 840 19. Alonso, L. *et al.* TIGER: The gene expression regulatory variation landscape of human  
841 pancreatic islets. *Cell Rep.* **37**, (2021).
- 842 20. Nguyen, J. P. *et al.* eQTL mapping in fetal-like pancreatic progenitor cells reveals early  
843 developmental insights into diabetes risk. *Nat. Commun.* **14**, 6928 (2023).
- 844 21. Smith, K. *et al.* Multi-ancestry polygenic mechanisms of type 2 diabetes. *Nat. Med.* 1–10  
845 (2024) doi:10.1038/s41591-024-02865-3.
- 846 22. Kachuri, L. *et al.* Gene expression in African Americans, Puerto Ricans and Mexican  
847 Americans reveals ancestry-specific patterns of genetic architecture. *Nat. Genet.* **55**, 952–  
848 963 (2023).
- 849 23. THE GTEx CONSORTIUM. The GTEx Consortium atlas of genetic regulatory effects across  
850 human tissues. *Science* **369**, 1318–1330 (2020).
- 851 24. Gloudemans, M. J. *et al.* Integration of genetic colocalizations with physiological and  
852 pharmacological perturbations identifies cardiometabolic disease genes. *Genome Med.* **14**,  
853 31 (2022).
- 854 25. Solimena, M. *et al.* Systems biology of the IMIDIA biobank from organ donors and  
855 pancreatectomised patients defines a novel transcriptomic signature of islets from  
856 individuals with type 2 diabetes. *Diabetologia* **61**, 641–657 (2018).
- 857 26. Ferrannini, E. *et al.* Mechanisms of Sodium–Glucose Cotransporter 2 Inhibition: Insights  
858 From Large-Scale Proteomics. *Diabetes Care* **43**, 2183–2189 (2020).
- 859 27. Wittenbecher, C. *et al.* Insulin-Like Growth Factor Binding Protein 2 (IGFBP-2) and the Risk  
860 of Developing Type 2 Diabetes. *Diabetes* **68**, 188–197 (2018).
- 861 28. Xin, Y. *et al.* Pseudotime Ordering of Single Human  $\beta$ -Cells Reveals States of Insulin  
862 Production and Unfolded Protein Response. *Diabetes* **67**, 1783–1794 (2018).
- 863 29. Yang, J. *et al.* Circulating IGFBP-2 levels are inversely associated with the incidence of  
864 nonalcoholic fatty liver disease: A cohort study. *J. Int. Med. Res.* **48**, 0300060520935219  
865 (2020).

- 866 30. Fahlbusch, P. *et al.* Physiological Disturbance in Fatty Liver Energy Metabolism Converges  
867 on IGFBP2 Abundance and Regulation in Mice and Men. *Int. J. Mol. Sci.* **21**, 4144 (2020).
- 868 31. Arruda, A. L., Morris, A. P. & Zeggini, E. Advancing equity in human genomics through  
869 tissue-specific multi-ancestry molecular data. *Cell Genomics* **4**, 100485 (2024).
- 870 32. Olsen, O., Wade, J. B., Morin, N., Bredt, D. S. & Welling, P. A. Differential localization of  
871 mammalian Lin-7 (MALS/Veli) PDZ proteins in the kidney. *Am. J. Physiol. Renal Physiol.*  
872 **288**, F345-352 (2005).
- 873 33. Jia, Z. *et al.* ACSS3 in brown fat drives propionate catabolism and its deficiency leads to  
874 autophagy and systemic metabolic dysfunction. *Clin. Transl. Med.* **12**, e665 (2022).
- 875 34. Virtanen, J. K., Tuomainen, T.-P. & Voutilainen, S. Dietary intake of choline and  
876 phosphatidylcholine and risk of type 2 diabetes in men: The Kuopio Ischaemic Heart  
877 Disease Risk Factor Study. *Eur. J. Nutr.* **59**, 3857–3861 (2020).
- 878 35. Wong, T. H. T. *et al.* A two-sample Mendelian randomization study explores metabolic  
879 profiling of different glycemic traits. *Commun. Biol.* **7**, 1–9 (2024).
- 880 36. Opreanu, M. *et al.* The Unconventional Role of Acid Sphingomyelinase in Regulation of  
881 Retinal Microangiopathy in Diabetic Human and Animal Models. *Diabetes* **60**, 2370–2378  
882 (2011).
- 883 37. Minikel, E. V., Painter, J. L., Dong, C. C. & Nelson, M. R. Refining the impact of genetic  
884 evidence on clinical success. 2023.06.23.23291765 Preprint at  
885 <https://doi.org/10.1101/2023.06.23.23291765> (2023).
- 886 38. Sadler, M. C., Auwerx, C., Deelen, P. & Kutalik, Z. Multi-layered genetic approaches to  
887 identify approved drug targets. *Cell Genomics* **3**, 100341 (2023).
- 888 39. Flamez, D. *et al.* A genomic-based approach identifies FXYP domain containing ion  
889 transport regulator 2 (FXYP2)gammaa as a pancreatic beta cell-specific biomarker.  
890 *Diabetologia* **53**, 1372–1383 (2010).

- 891 40. Wetzel, R. K., Pascoa, J. L. & Arystarkhova, E. Stress-induced Expression of the  $\gamma$  Subunit  
892 (FXVD2) Modulates Na,K-ATPase Activity and Cell Growth\*. *J. Biol. Chem.* **279**, 41750–  
893 41757 (2004).
- 894 41. Chandra, V. *et al.* The type 1 diabetes gene TYK2 regulates  $\beta$ -cell development and its  
895 responses to interferon- $\alpha$ . *Nat. Commun.* **13**, 6363 (2022).
- 896 42. Krentz, N. A. J. *et al.* Single-Cell Transcriptome Profiling of Mouse and hESC-Derived  
897 Pancreatic Progenitors. *Stem Cell Rep.* **11**, 1551–1564 (2018).
- 898 43. Balboa, D. *et al.* Functional, metabolic and transcriptional maturation of human pancreatic  
899 islets derived from stem cells. *Nat. Biotechnol.* **40**, 1042–1055 (2022).
- 900 44. Marselli, L. *et al.* Persistent or Transient Human  $\beta$  Cell Dysfunction Induced by Metabolic  
901 Stress: Specific Signatures and Shared Gene Expression with Type 2 Diabetes. *Cell Rep.*  
902 **33**, (2020).
- 903 45. Elgamal, R. M. *et al.* An Integrated Map of Cell Type–Specific Gene Expression in  
904 Pancreatic Islets. *Diabetes* **72**, 1719–1728 (2023).
- 905 46. Kopf, D. *et al.* Insulin Secretion and Sensitivity after Single-Dose Amisulpride, Olanzapine or  
906 Placebo in Young Male Subjects: Double Blind, Cross-Over Glucose Clamp Study.  
907 *Pharmacopsychiatry* **45**, 223–228 (2012).
- 908 47. Glunk, V. *et al.* A non-coding variant linked to metabolic obesity with normal weight affects  
909 actin remodelling in subcutaneous adipocytes. *Nat. Metab.* **5**, 861–879 (2023).
- 910 48. Rusu, V. *et al.* Type 2 Diabetes Variants Disrupt Function of SLC16A11 through Two  
911 Distinct Mechanisms. *Cell* **170**, 199-212.e20 (2017).
- 912 49. Rottner, A. K. *et al.* A genome-wide CRISPR screen identifies CALCOCO2 as a regulator of  
913 beta cell function influencing type 2 diabetes risk. *Nat. Genet.* **55**, 54–65 (2023).
- 914 50. Dwivedi, O. P. *et al.* Loss of ZnT8 function protects against diabetes by enhanced insulin  
915 secretion. *Nat. Genet.* **51**, 1596–1606 (2019).

- 916 51. Thomsen, S. K. *et al.* Type 2 diabetes risk alleles in PAM impact insulin release from human  
917 pancreatic  $\beta$ -cells. *Nat. Genet.* **50**, 1122–1131 (2018).
- 918 52. Abifadel, M. *et al.* Mutations in PCSK9 cause autosomal dominant hypercholesterolemia.  
919 *Nat. Genet.* **34**, 154–156 (2003).
- 920 53. Santer, R. & Calado, J. Familial renal glucosuria and SGLT2: from a mendelian trait to a  
921 therapeutic target. *Clin. J. Am. Soc. Nephrol. CJASN* **5**, 133–141 (2010).
- 922 54. Chen, J. *et al.* The trans-ancestral genomic architecture of glycemic traits. *Nat. Genet.* **53**,  
923 840–860 (2021).
- 924 55. Graham, S. E. *et al.* The power of genetic diversity in genome-wide association studies of  
925 lipids. *Nature* **600**, 675–679 (2021).
- 926 56. Sakaue, S. *et al.* A cross-population atlas of genetic associations for 220 human  
927 phenotypes. *Nat. Genet.* **53**, 1415–1424 (2021).
- 928 57. Sulc, J. *et al.* Composite trait Mendelian randomization reveals distinct metabolic and  
929 lifestyle consequences of differences in body shape. *Commun. Biol.* **4**, 1–13 (2021).
- 930 58. Liu, Y. *et al.* Genetic architecture of 11 organ traits derived from abdominal MRI using deep  
931 learning. *eLife* **10**, e65554 (2021).
- 932 59. Warrington, N. M. *et al.* Maternal and fetal genetic effects on birth weight and their  
933 relevance to cardio-metabolic risk factors. *Nat. Genet.* **51**, 804–814 (2019).
- 934 60. Agrawal, S. *et al.* Inherited basis of visceral, abdominal subcutaneous and gluteofemoral fat  
935 depots. *Nat. Commun.* **13**, 3771 (2022).
- 936 61. Evangelou, E. *et al.* Genetic analysis of over 1 million people identifies 535 new loci  
937 associated with blood pressure traits. *Nat. Genet.* **50**, 1412–1425 (2018).
- 938 62. Stanzick, K. J. *et al.* Discovery and prioritization of variants and genes for kidney function in  
939 >1.2 million individuals. *Nat. Commun.* **12**, 4350 (2021).
- 940 63. Teumer, A. *et al.* Genome-wide association meta-analyses and fine-mapping elucidate  
941 pathways influencing albuminuria. *Nat. Commun.* **10**, 4130 (2019).

- 942 64. Hartiala, J. A. *et al.* Genome-wide analysis identifies novel susceptibility loci for myocardial  
943 infarction. *Eur. Heart J.* **42**, 919–933 (2021).
- 944 65. Jiang, L., Zheng, Z., Fang, H. & Yang, J. A generalized linear mixed model association tool  
945 for biobank-scale data. *Nat. Genet.* **53**, 1616–1621 (2021).
- 946 66. Sandholm, N. *et al.* Genome-wide meta-analysis and omics integration identifies novel  
947 genes associated with diabetic kidney disease. *Diabetologia* **65**, 1495–1509 (2022).
- 948 67. van Zuydam, N. R. *et al.* Genome-Wide Association Study of Peripheral Artery Disease.  
949 *Circ. Genomic Precis. Med.* **14**, e002862 (2021).
- 950 68. Wuttke, M. *et al.* A catalog of genetic loci associated with kidney function from analyses of a  
951 million individuals. *Nat. Genet.* **51**, 957–972 (2019).
- 952 69. Liu, H. *et al.* Epigenomic and transcriptomic analyses define core cell types, genes and  
953 targetable mechanisms for kidney disease. *Nat. Genet.* **54**, 950–962 (2022).
- 954 70. Malik, R. *et al.* Multiancestry genome-wide association study of 520,000 subjects identifies  
955 32 loci associated with stroke and stroke subtypes. *Nat. Genet.* **50**, 524–537 (2018).
- 956 71. Willer, C. J., Li, Y. & Abecasis, G. R. METAL: fast and efficient meta-analysis of  
957 genomewide association scans. *Bioinformatics* **26**, 2190–2191 (2010).
- 958 72. Ferkingstad, E. *et al.* Large-scale integration of the plasma proteome with genetics and  
959 disease. *Nat. Genet.* **53**, 1712–1721 (2021).
- 960 73. Sun, B. B. *et al.* Plasma proteomic associations with genetics and health in the UK Biobank.  
961 *Nature* **622**, 329–338 (2023).
- 962 74. Panoutsopoulou, K. *et al.* Genetic characterization of Greek population isolates reveals  
963 strong genetic drift at missense and trait-associated variants. *Nat. Commun.* **5**, 5345 (2014).
- 964 75. Png, G. *et al.* Identifying causal serum protein-cardiometabolic trait relationships using  
965 whole genome sequencing. *Hum. Mol. Genet.* **32**, 1266–1275 (2023).
- 966 76. Png, G. *et al.* Mapping the serum proteome to neurological diseases using whole genome  
967 sequencing. *Nat. Commun.* **12**, 7042 (2021).

- 968 77. Gilly, A. *et al.* Genome-wide meta-analysis of 92 cardiometabolic protein serum levels. *Mol.*  
969 *Metab.* **78**, 101810 (2023).
- 970 78. Robins, C. *et al.* Genetic control of the human brain proteome. *Am. J. Hum. Genet.* **108**,  
971 400–410 (2021).
- 972 79. Yin, X. *et al.* Genome-wide association studies of metabolites in Finnish men identify  
973 disease-relevant loci. *Nat. Commun.* **13**, 1644 (2022).
- 974 80. Borges, M. C. *et al.* Role of circulating polyunsaturated fatty acids on cardiovascular  
975 diseases risk: analysis using Mendelian randomization and fatty acid genetic association  
976 data from over 114,000 UK Biobank participants. *BMC Med.* **20**, 210 (2022).
- 977 81. Giambartolomei, C. *et al.* Bayesian Test for Colocalisation between Pairs of Genetic  
978 Association Studies Using Summary Statistics. *PLOS Genet.* **10**, e1004383 (2014).
- 979 82. Shannon, P. *et al.* Cytoscape: a software environment for integrated models of biomolecular  
980 interaction networks. *Genome Res.* **13**, 2498–2504 (2003).
- 981 83. Wolf, F. A., Angerer, P. & Theis, F. J. SCANPY: large-scale single-cell gene expression  
982 data analysis. *Genome Biol.* **19**, 15 (2018).
- 983 84. Robinson, M. D., McCarthy, D. J. & Smyth, G. K. edgeR: a Bioconductor package for  
984 differential expression analysis of digital gene expression data. *Bioinformatics* **26**, 139–140  
985 (2010).
- 986 85. Patro, R., Duggal, G., Love, M. I., Irizarry, R. A. & Kingsford, C. Salmon provides fast and  
987 bias-aware quantification of transcript expression. *Nat. Methods* **14**, 417–419 (2017).
- 988 86. Love, M. I., Huber, W. & Anders, S. Moderated estimation of fold change and dispersion for  
989 RNA-seq data with DESeq2. *Genome Biol.* **15**, 550 (2014).
- 990 87. Ochoa, D. *et al.* Open Targets Platform: supporting systematic drug-target identification and  
991 prioritisation. *Nucleic Acids Res.* **49**, D1302–D1310 (2021).
- 992



Figure 1

**a**

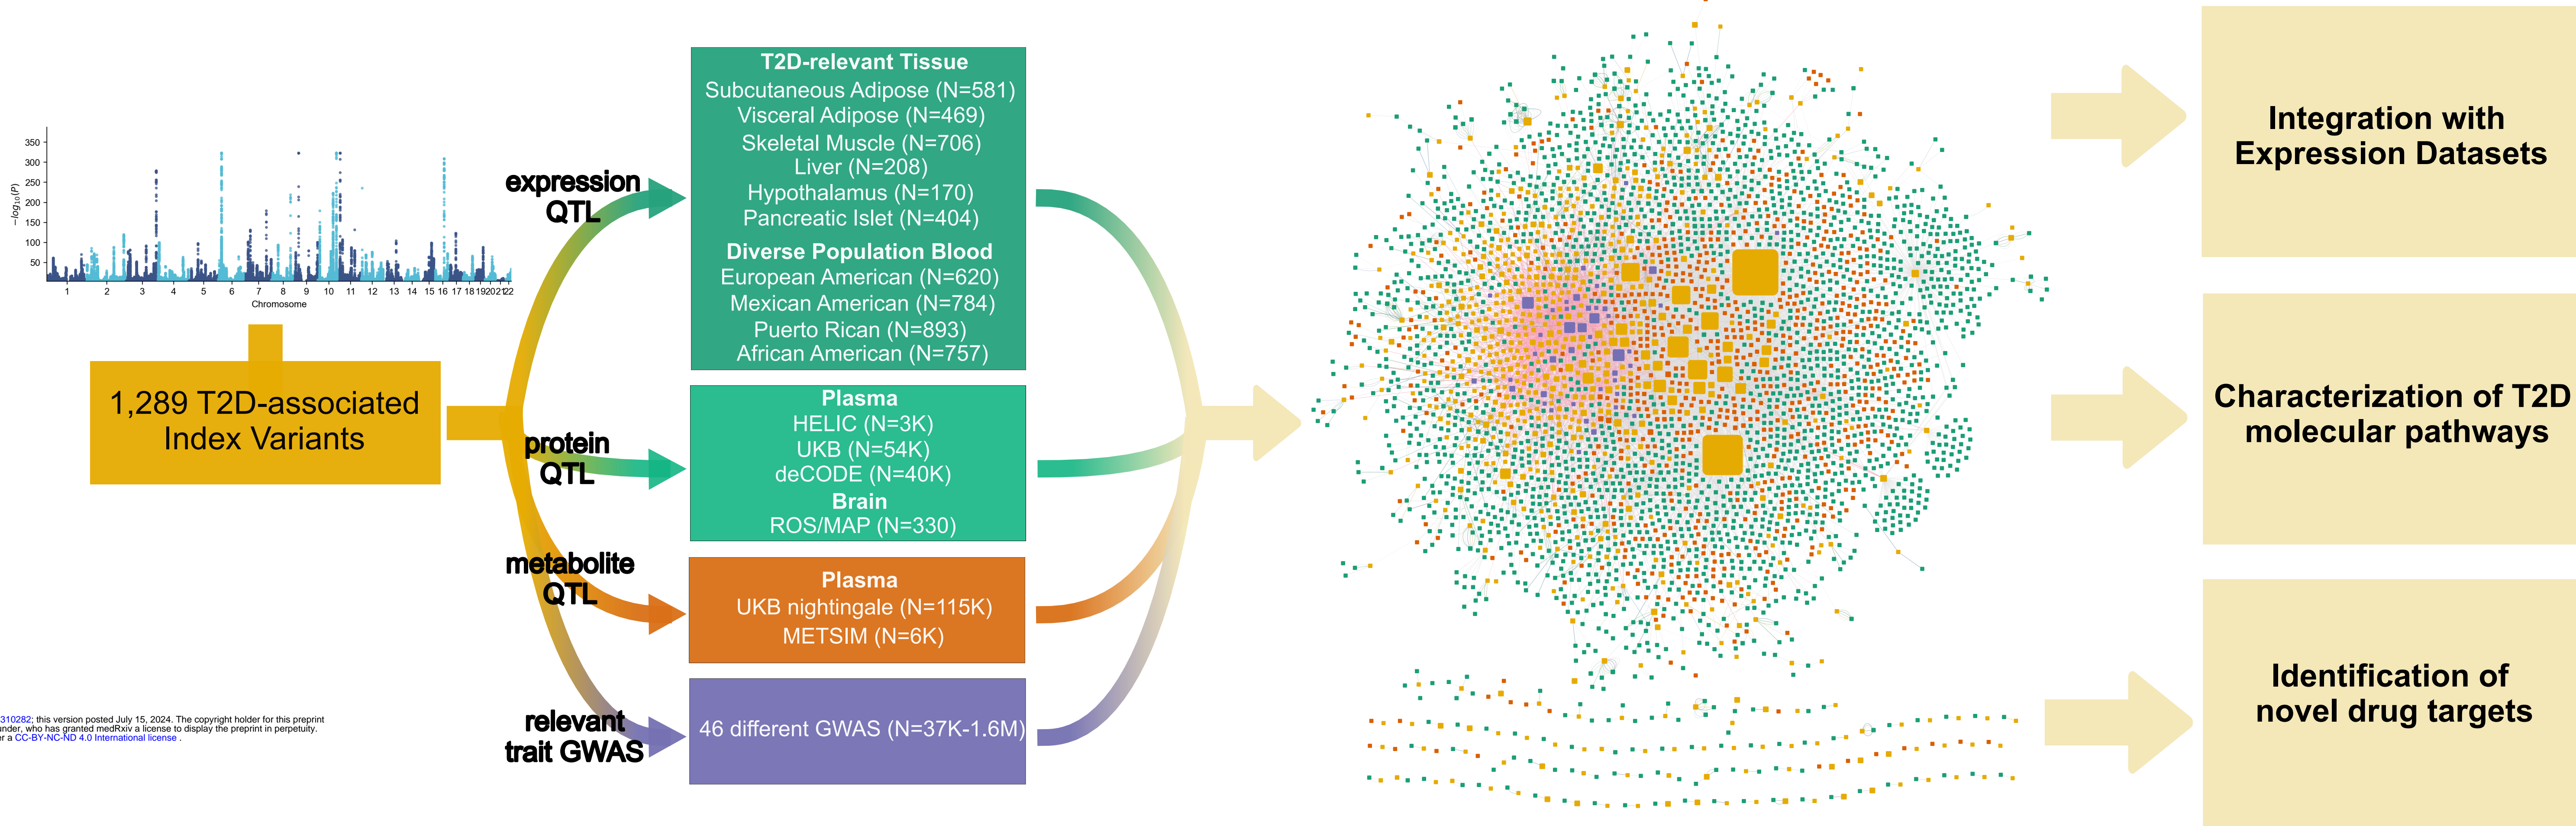

medRxiv preprint doi: <https://doi.org/10.1101/2024.07.15.24310282>; this version posted July 15, 2024. The copyright holder for this preprint (which was not certified by peer review) is the author/funder, who has granted medRxiv a license to display the preprint in perpetuity. It is made available under a [CC-BY-NC-ND 4.0 International license](https://creativecommons.org/licenses/by-nc-nd/4.0/).

**b**

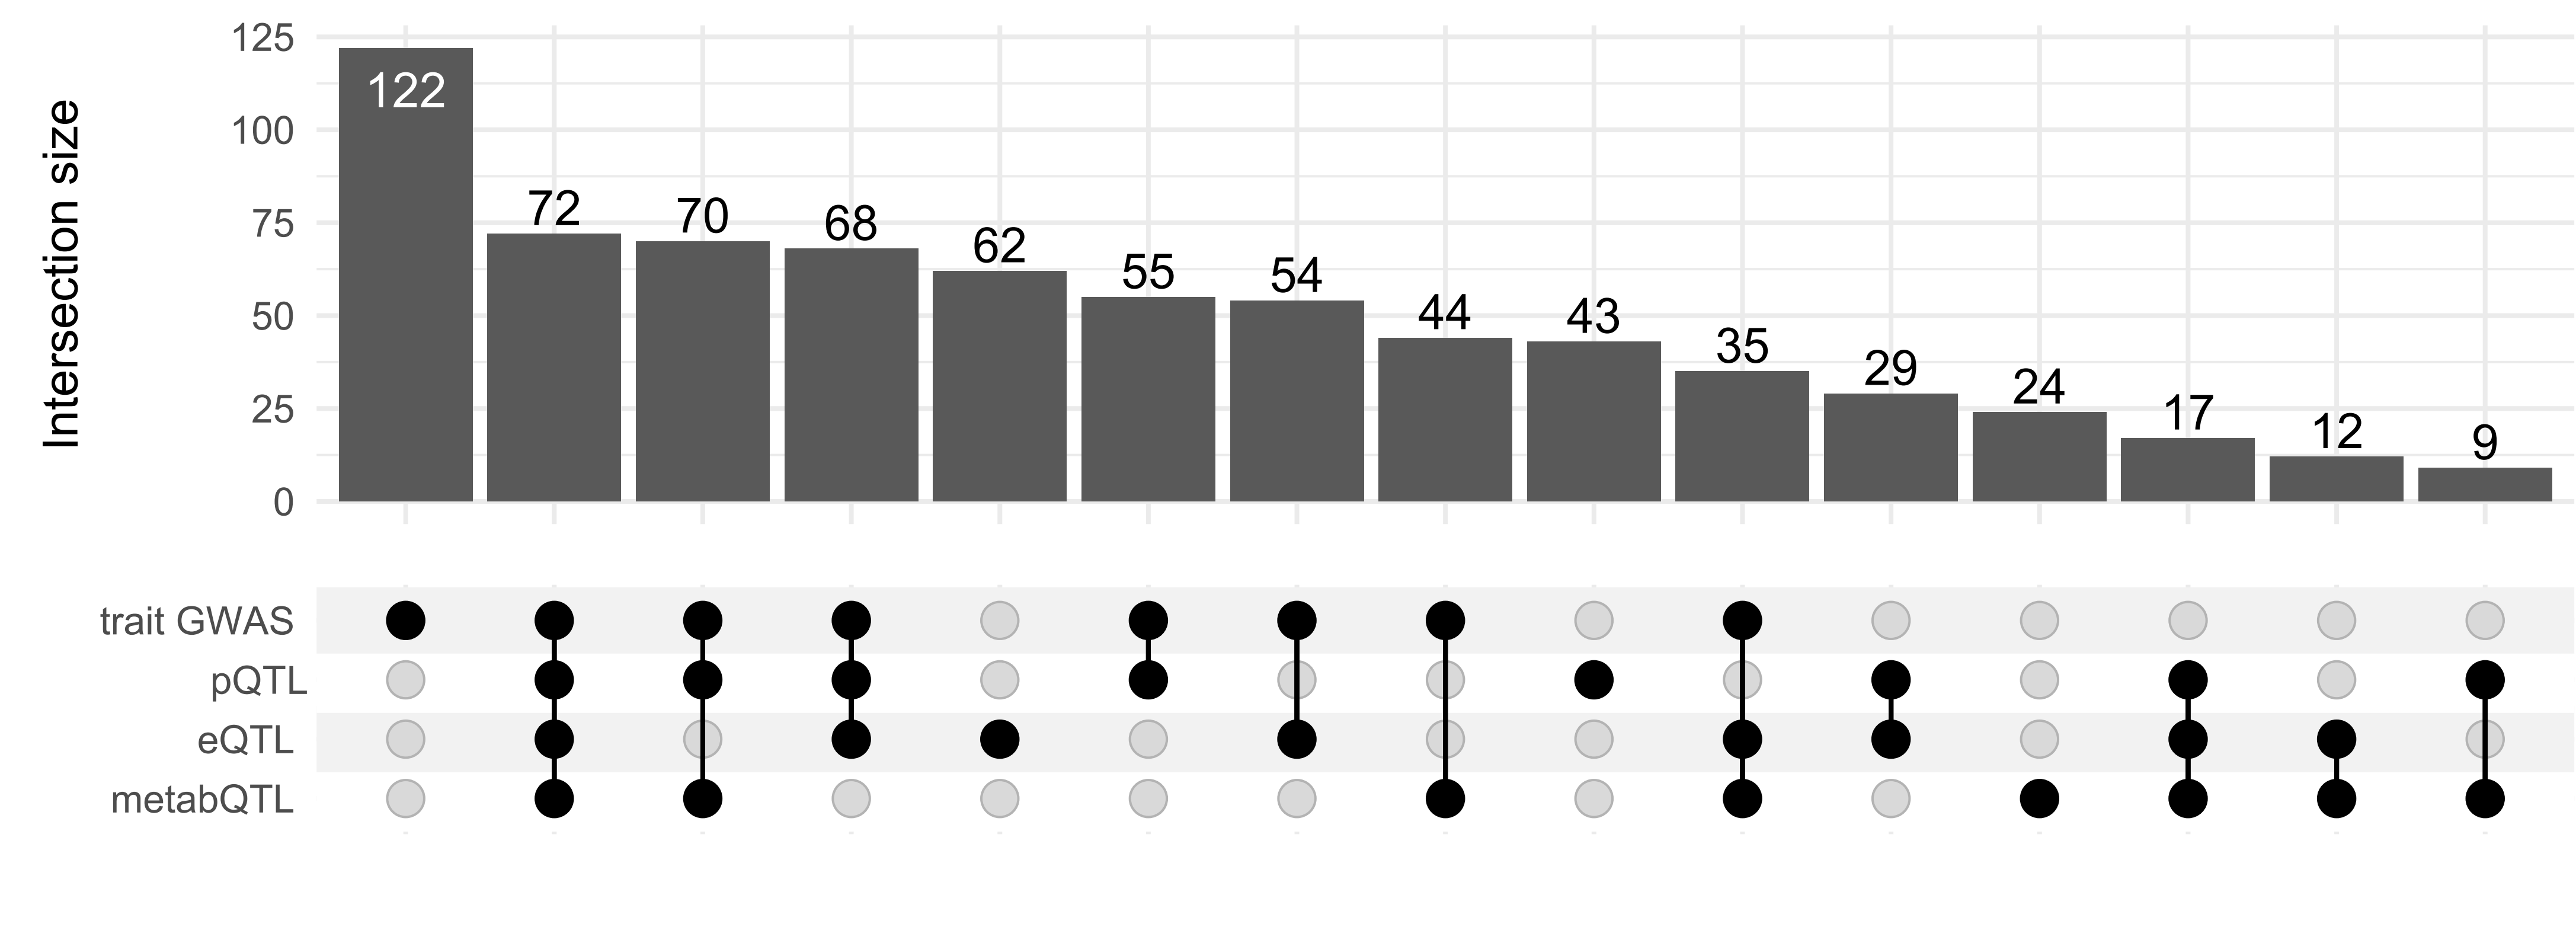

**c**

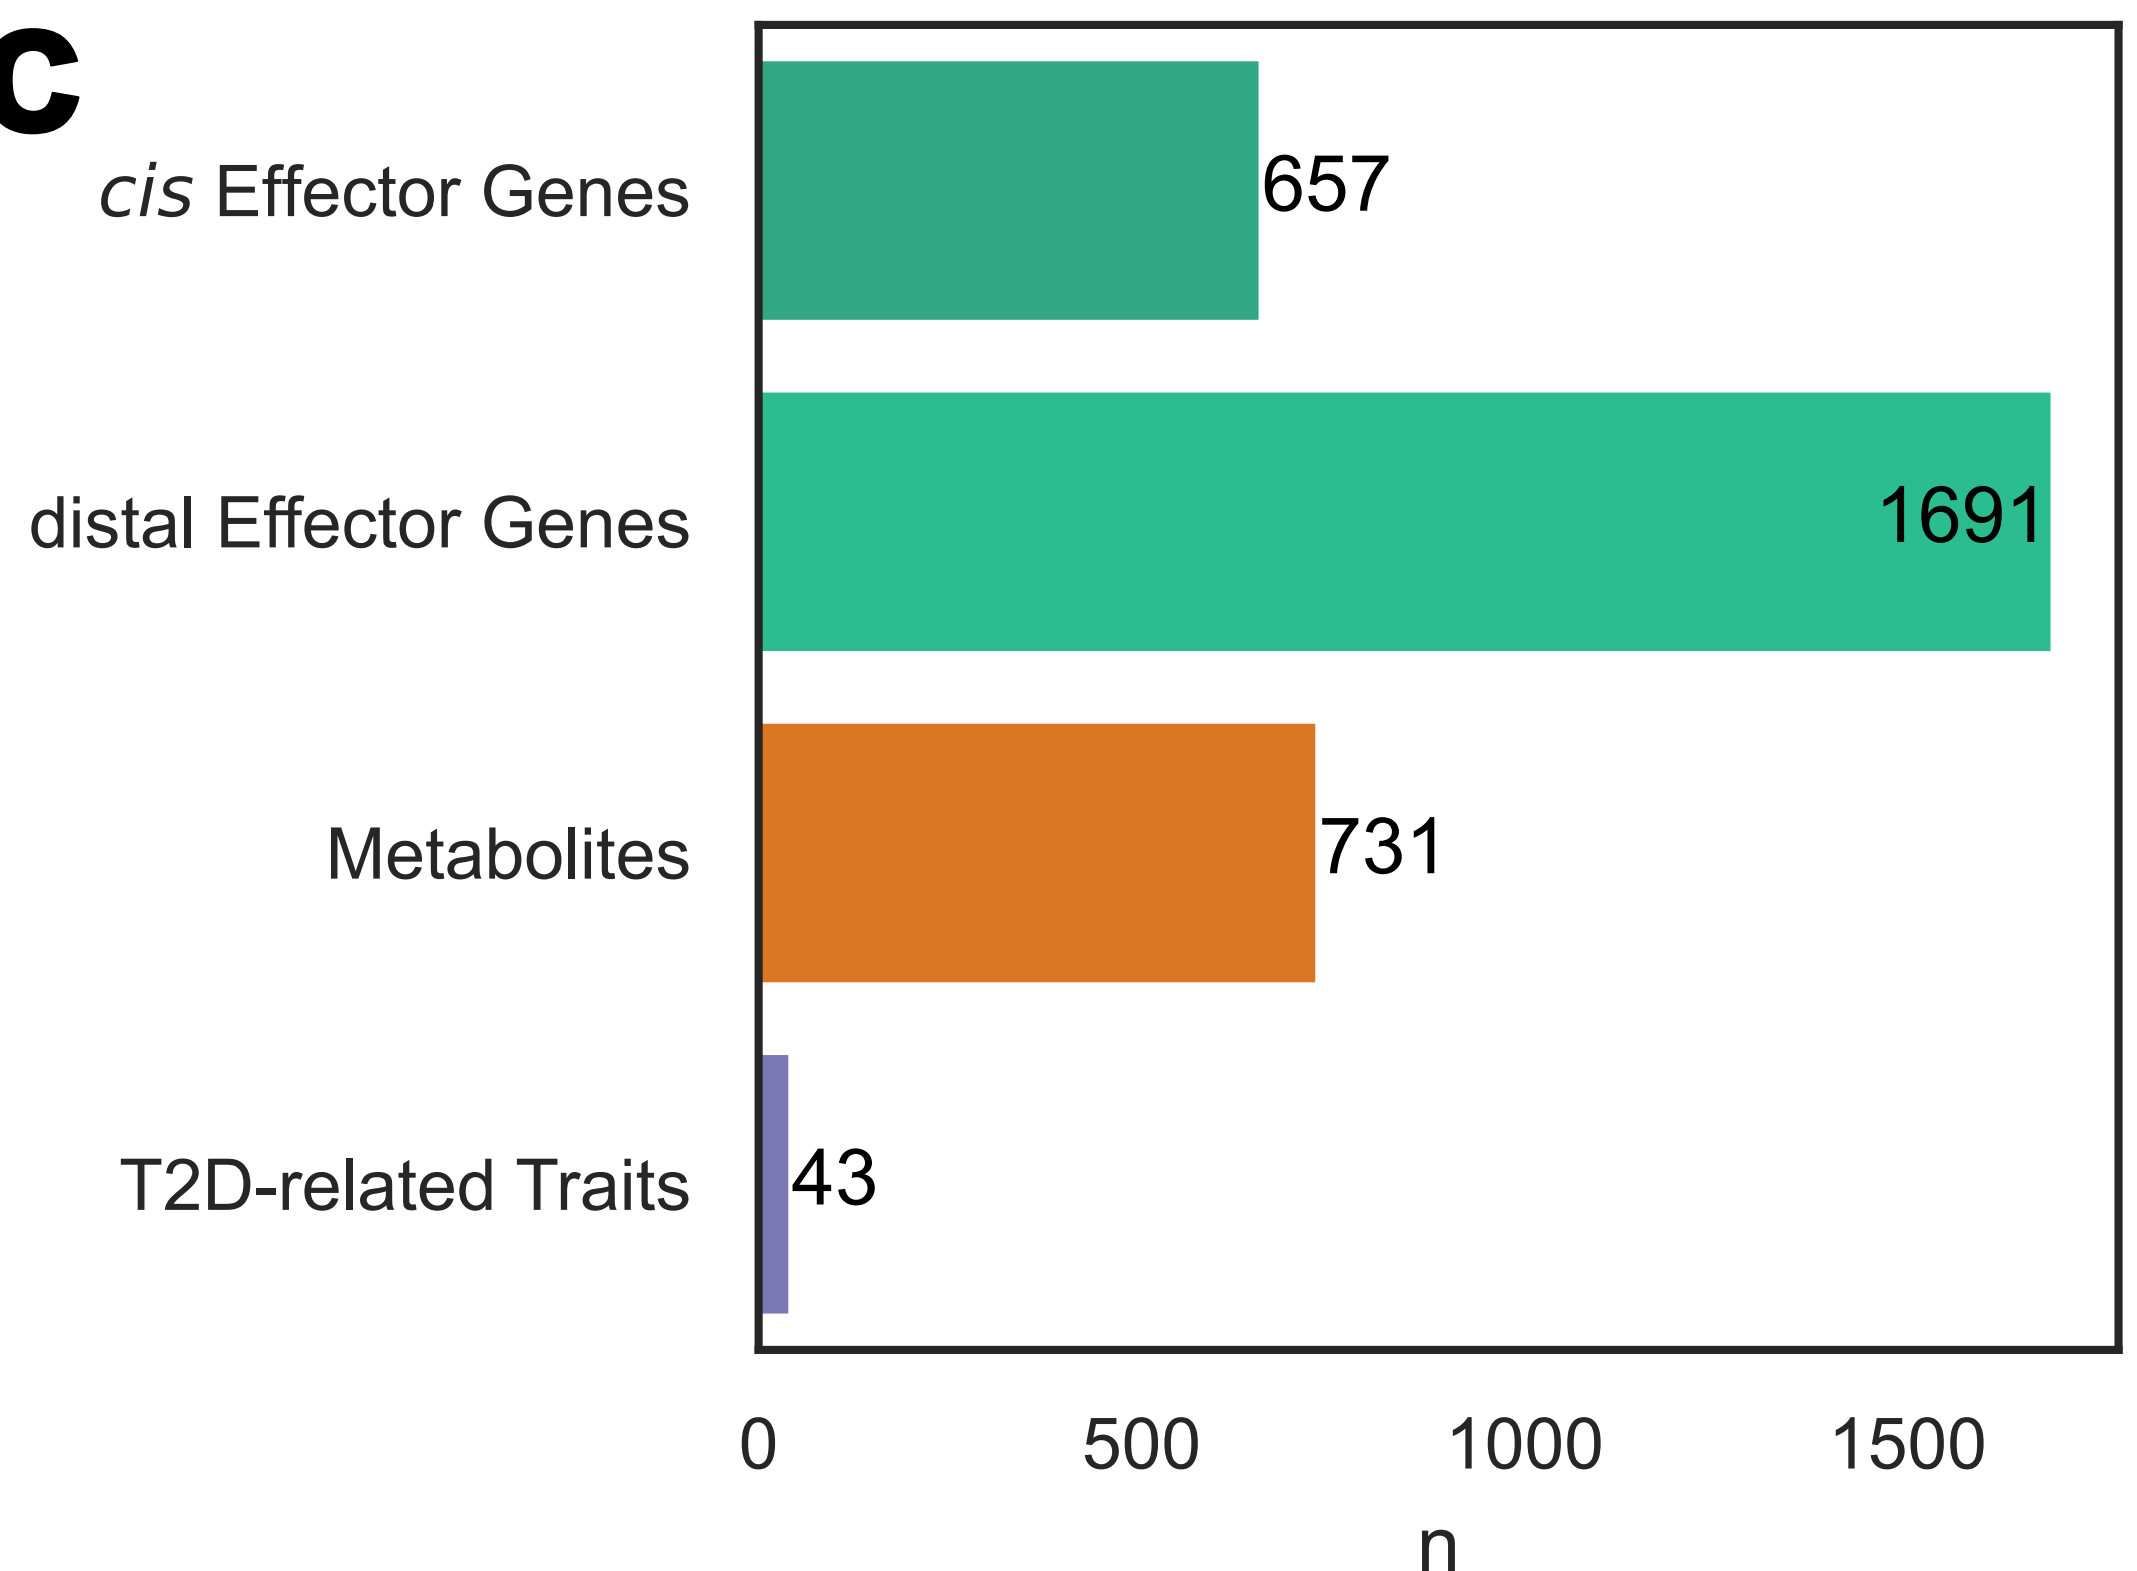



# Figure 2

## a

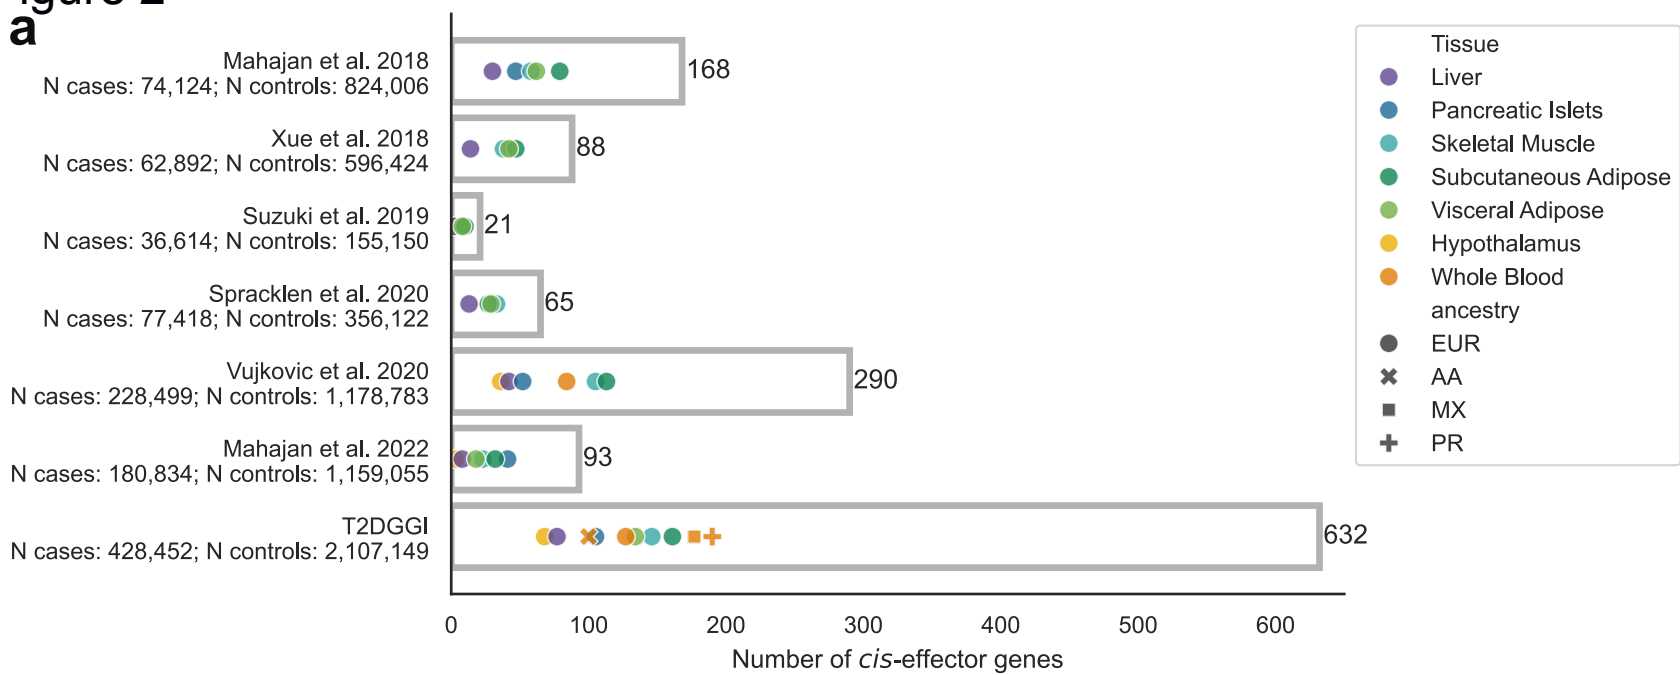

## b

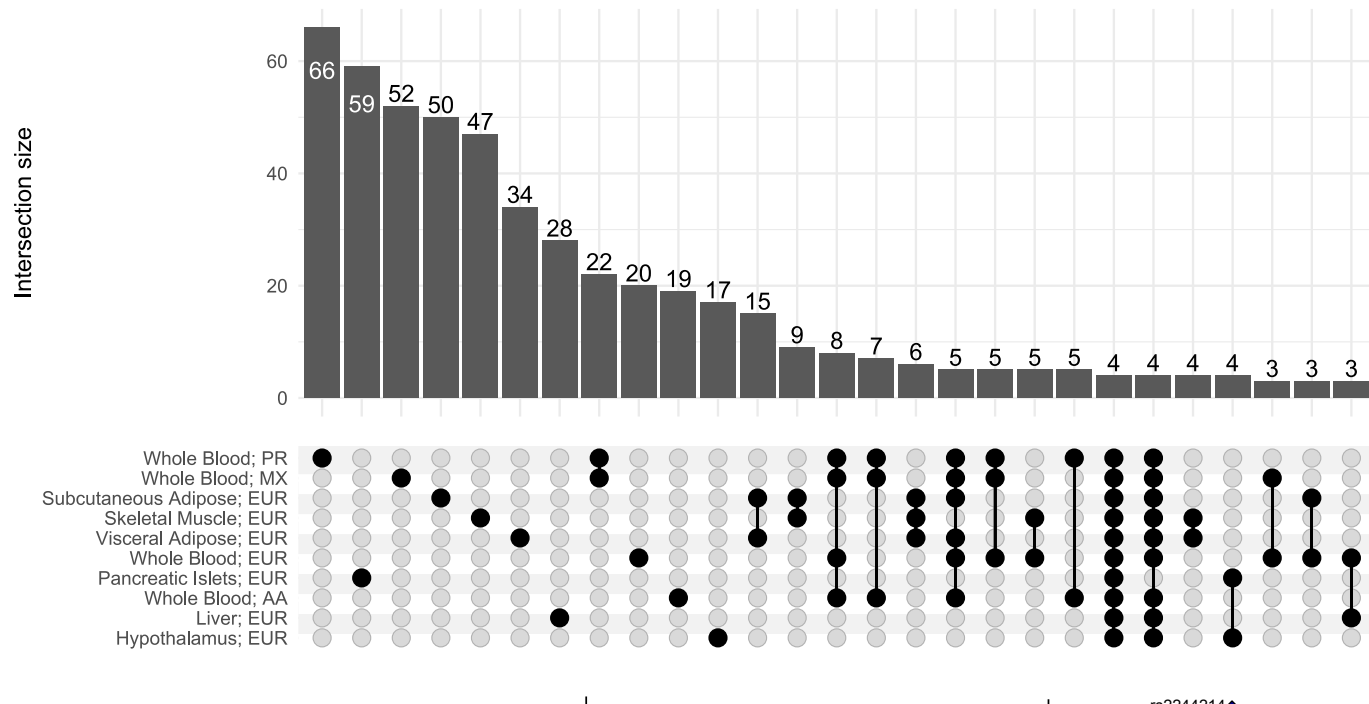

## c

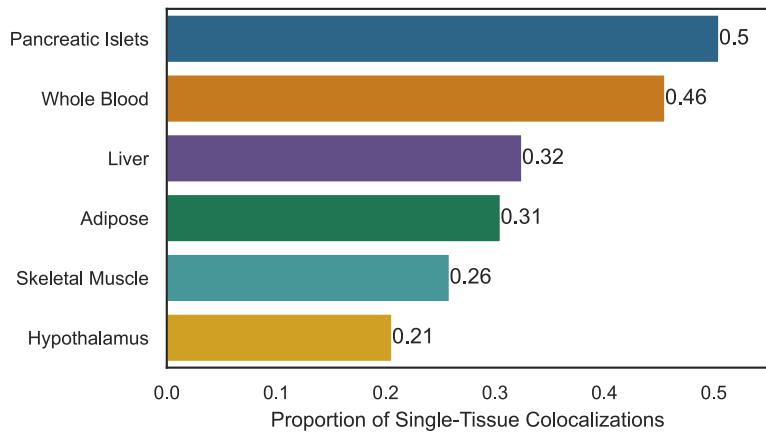

## d

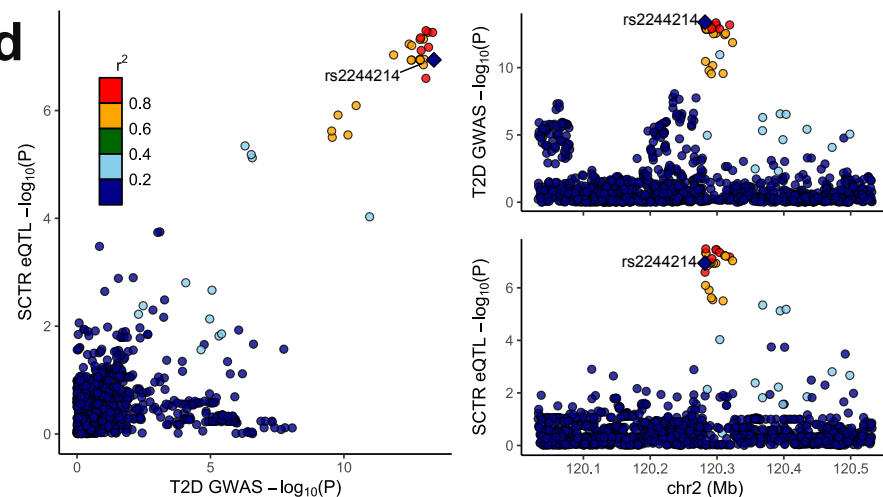





Figure 5

**a**

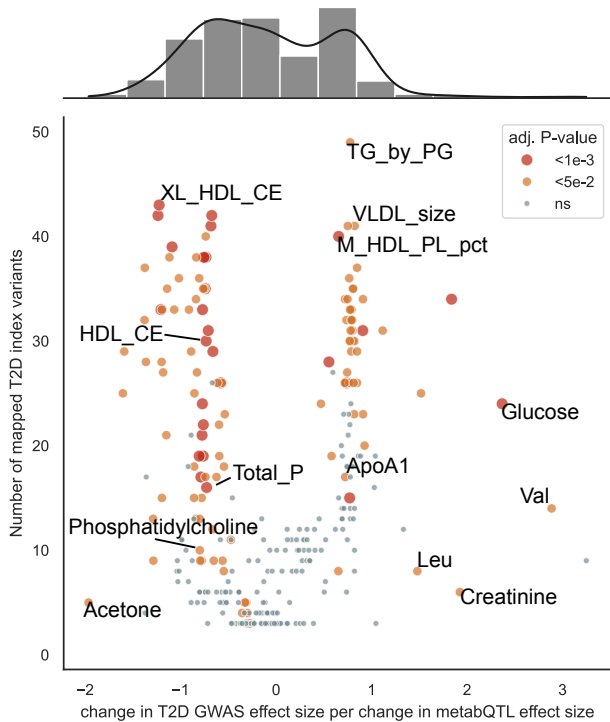

**b**

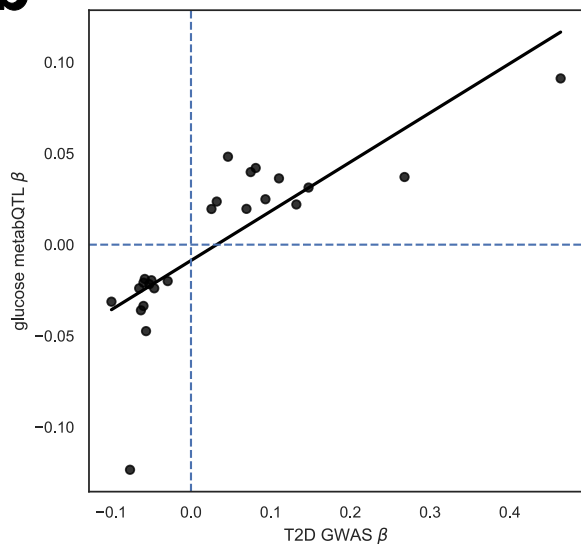

**c**

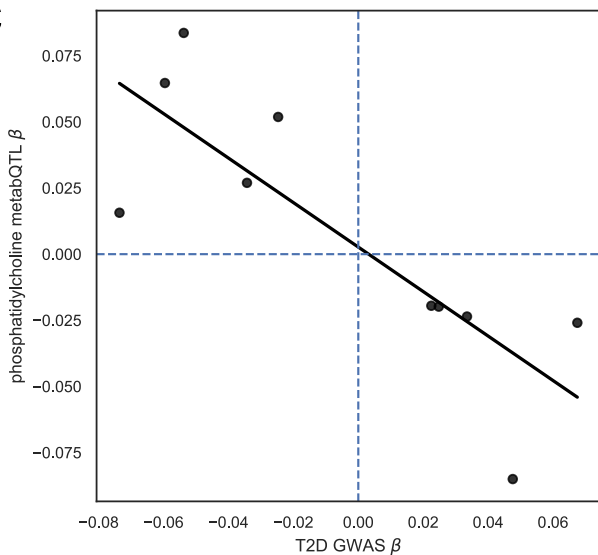

**d**

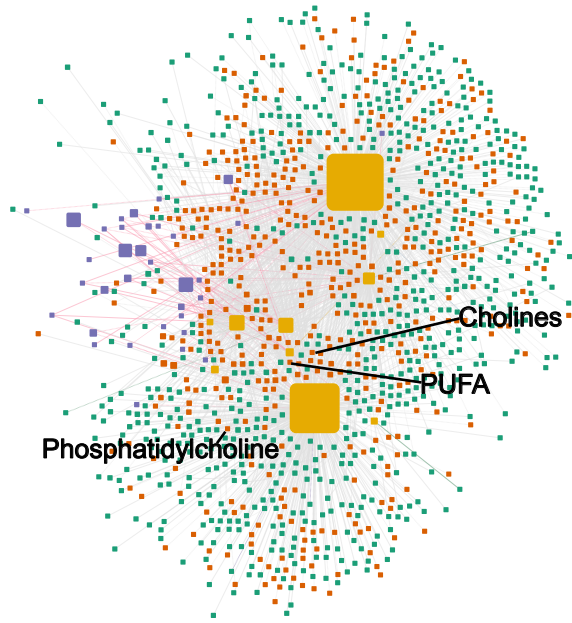

Figure 6

**a**

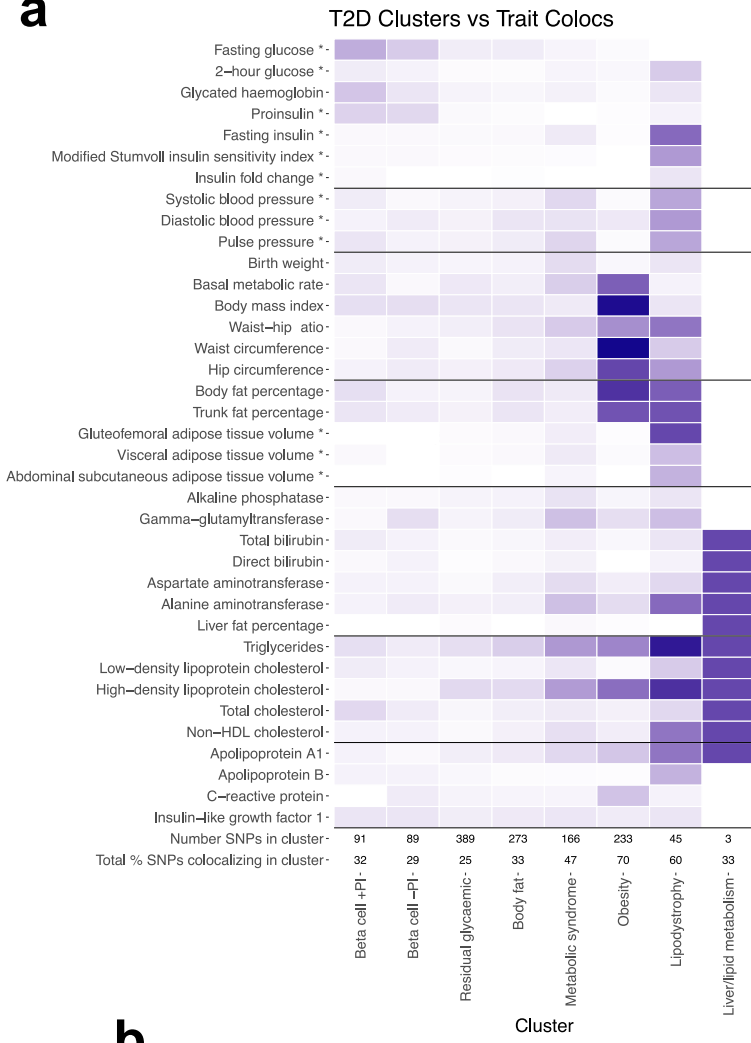

### T2D Clusters vs Trait Colocs

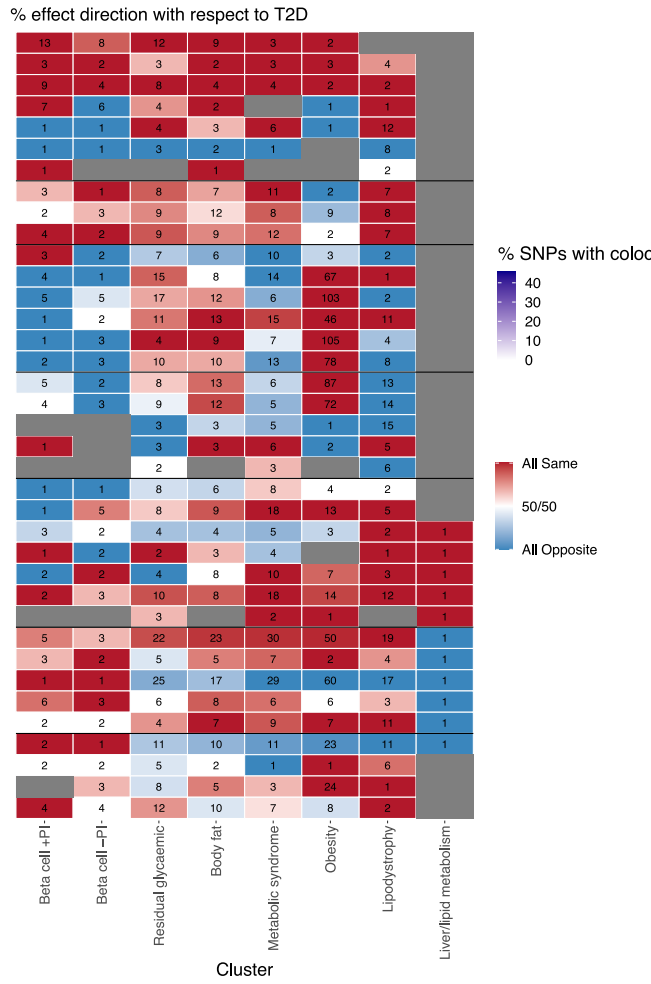

**b**

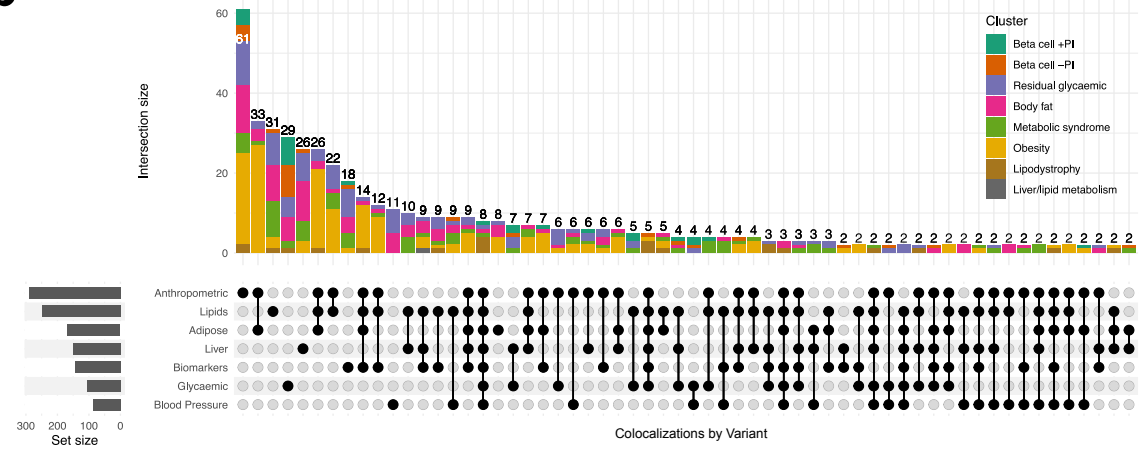

**c**

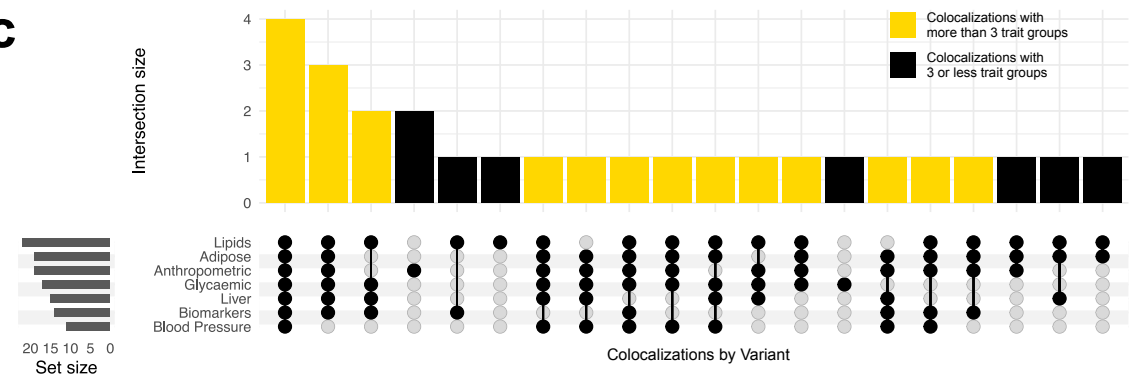

**Figure 7**

**a** Approved Diabetes Indication

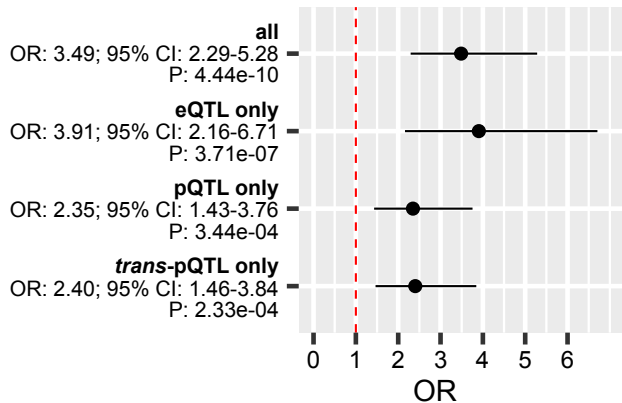

**b** Diabetes Indication

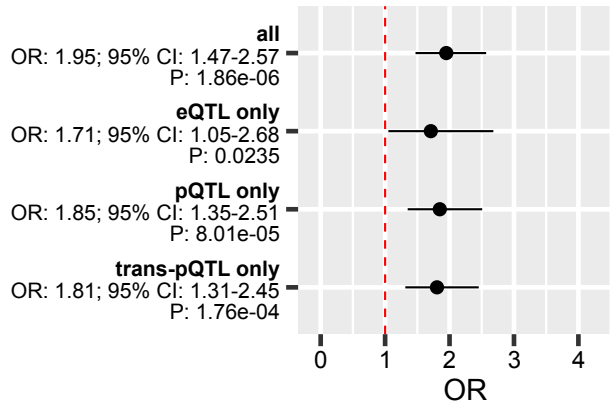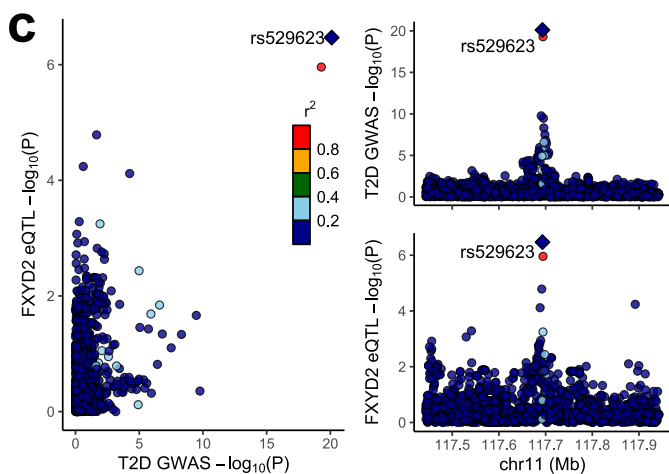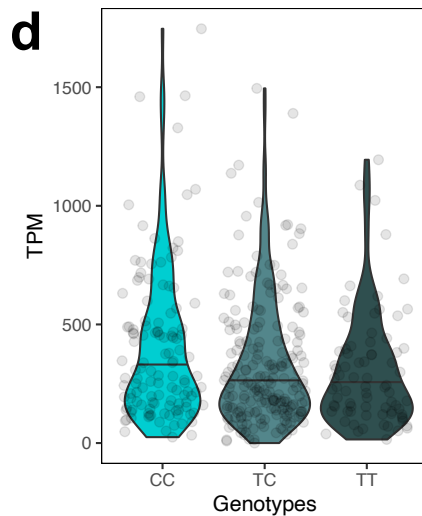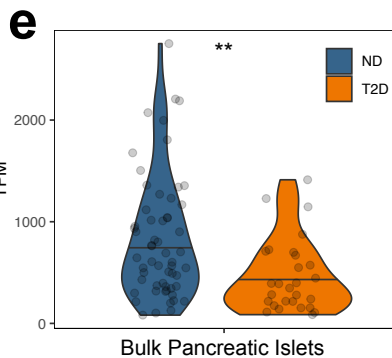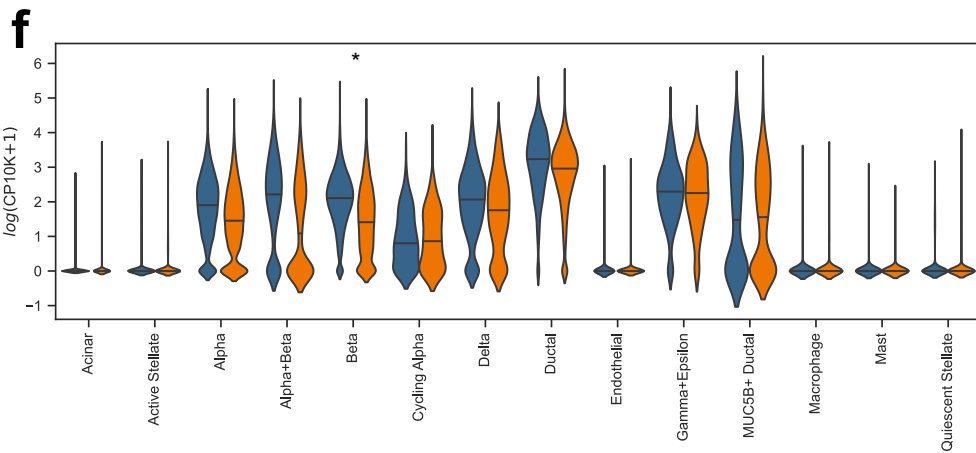

Source: https://medrxiv.org/content/10.1101/2024.07.15.24310282v1.full.pdf
